# Supplementary material for: HIV incidence among pregnant and postpartum women in a high prevalence setting
Source: PLoS One. 2018 Dec 28;13(12):e0209782. doi: 10.1371/journal.pone.0209782 (PMC6310250; doi:10.1371/journal.pone.0209782)
Supplement: S1 File — (XLSX) [file pone.0209782.s001.xlsx]

## Sheet: data
newid	district	hivsc	scperiod	gestage	predelivsc	postdelivsc	gestgrp	siteid	age	marital	education	partnerage	partnereducn	partnerhivtest	partnerhivstatus	sexactive	sexpartners	condomuse	protect1	protect2	protect3	protect4	protect5	protect6	protect7	protect8	hxgi	syphilis	hsv	gu	discharge	hivcounseling	nofollowup	fpsexactive	fpginf	fpsyphilis	fphsv	fpgulcer	fpdischarge	fpcounseled	fpmultipartner	fpcondommain	fpcondomother	fpprotect1	fpprotect2	fpprotect3	fpprotect4	fpprotect5	fpprotect6
1																																		0	0	0	0	0	0	1	0	0	0	0	1	1	0	1	0
2	1	0		36	0	0	3	11	21	3	3	21	3	99		0	0	2	0	0	0	0	0	0	0	0	0					0	0	1	0	0	0	0	0	0	0	1	0	1	0	0	0	0	0
3	1	0		19	0	0	1	11	22	1	1	26	1	1	0	1	1	4	0	0	0	0	0	1	0	0	0					0	0	1	1	0	0	0	1	1	1	1	1	1	1	1	1	1	1
4	1	0		38	0	0	3	11	22	3	1	25	1	99		0	1	4	0	0	0	0	0	1	0	0	0					0	0	0	0	0	0	0	0	0	0	0	0	0	0	0	0	1	1
5	1	0		38	0	0	3	11	23	1	1	30	0	0		1	1	4	0	0	0	0	0	1	0	0	0					1	0	1	1	0	0	0	1	1	0	1	0	1	0	1	1	1	0
6	1							11	32	1	1	39	0	1	0	0	0	4	0	0	0	0	0	1	0	0	0					0	1	1	0	0	0	0	0	0	0	0	0	0	0	0	0	0	1
7	1	0		28	0	0	2	11	22	1	1	26	1	0		0	0	4	0	0	0	0	0	1	0	0	0					0	0	1	0	0	0	0	0	1	1	1	1	1	1	1	1	1	0
8	1	0		34	0	0	3	11	16	1	1	27	0	0		1	1	4	0	0	0	0	0	1	0	0	0					0	0	1	0	0	0	0	0	1	0	0	0	0	0	1	1	1	1
9	1	0		28	0	0	2	11	20	1	2	23	2	0		1	1	4	0	0	0	0	0	1	0	0	1	0	0	0	1	0	0	1	1	0	0	0	1	1	0	1	0	1	1	1	1	1	0
10	1	0		32	0	0	3	11	18	1	1	21	1	1		1	1	4	0	0	0	0	0	1	0	0	1	0	0	0	0	0	0	1	1	0	0	0	1	1	0	1	0	1	1	1	1	1	1
11	1	0		38	0	0	3	11	19	1	2	26	3	0		1	1	4	0	0	0	0	0	0	0	1	0					0	0	1	0	0	0	0	0	1	0	1	0	1	1	1	1	1	1
12	1	0		17	0	0	1	11	19	1	1	26	1	0		1	1	4	0	0	0	0	0	1	0	0	1	0	0	0	1	0	0	1	0	0	0	0	0	1	1	0	1	1	1	1	1	0	1
13	1	0		28	0	0	2	11	18	1	2	25	1	1	0	1	1	4	1	0	0	0	0	0	0	0	0					0	0	1	1	0	0	0	1	1	0	1	0	1	1	1	1	1	1
14	1	0		37	0	0	3	11	34	1	1	36	1	1	0	1	1	4	0	0	0	0	1	0	0	0	0					0	0	1	0	0	0	0	0	1	0	1	0	0	1	1	1	1	1
15	1	0		10	0	0	1	11	31	1	3	37	3	0		1	1	1	1	0	0	0	1	0	0	1	1	0	0	0	1	0	0	1	0	0	0	0	0	1	0	1	0	1	1	1	1	1	0
16	1	0		32	0	0	3	11	28	1	2	29	1	1	1	1	1	1	1	0	0	0	1	0	0	1	1	0	0	0	1	1	0	1	0	0	0	0	0	1	0	1	0	1	1	1	1	1	1
17	1	0		38	0	0	3	11	20	1	1	22	1	0		1	1	4	0	0	0	0	0	1	0	0	0					0	0	0	0	0	0	0	0	1	0	0	0	0	1	1	1	1	0
18	1	0		36	0	0	3	11	16	1	1	21	1	0		0	1	4	0	0	0	0	1	0	0	0	0					0	0	1	0	0	0	0	0	1	0	0	0	0	1	1	1	1	1
19	1	0		32	0	0	3	11	37	1	1	42	1	0		1	1	2	0	0	0	0	0	1	0	0	0					1	0	1	0	0	0	0	0	1	0	0	0	0	0	0	0	1	1
20	1	0		10	0	0	1	11	23	1	1	31	1	1	0	1	1	4	0	0	0	0	0	1	0	0	1	0	0	0	1	0	0	1	0	0	0	0	0	1	0	1	0	1	1	1	1	1	1
21	1	0		28	0	0	2	11	37	1	1	43	0	1	0	1	1	4	0	0	0	0	0	1	0	0	0					0	0	1	1	0	0	0	1	1	1	0	0	1	1	1	1	0	1
22	1	0		36	0	0	3	11	31	1	1	34	1	1	0	1	1	4	0	0	0	0	0	1	0	0	0					0	0	1	0	0	0	0	0	1	0	1	0	1	1	1	1	1	1
23	1	0		25	0	0	2	11	27	1	1	35	1	1	0	1	1	2	1	0	0	0	0	0	0	0	0					0	0	1	0	0	0	0	0	1	0	1	0	1	0	1	0	1	1
24	1	0		17	0	0	1	11	28	1	1		1	1	0	1	1	2	1	0	0	0	0	0	0	0	0					0	0	1	0	0	0	0	0	1	0	1	0	1	1	1	1	1	1
25	1	0		28	0	0	2	11	20	1	2		1	1	0	1	1	2	0	0	0	0	0	1	0	0	1	0	0	0	1	0	0	1	0	0	0	0	0	1	1	0	1	0	1	1	1	1	1
26	1	0		32	0	0	3	11	21	3	1	22	1	0		0	2	4	0	0	0	0	0	1	0	0	0					1	0	0	0	0	0	0	0	1	0	1	0	1	0	0	0	0	1
27	1	0		20	0	0	1	11	17	1	1	23	1	1	0	1	1	4	0	0	0	0	0	1	0	0	0					0	0	1	0	0	0	0	0	1	0	0	0	1	1	1	1	1	1
28	1	0		12	0	0	1	11	20	1	1	23	1	1	0	1	1	4	0	0	0	0	0	1	0	0	0					0	0	1	0	0	0	0	0	1	0	0	0	1	1	1	1	1	1
29	1	0		32	0	0	3	11	30	1	0	46	1	1	1	0	2	4	0	0	0	0	0	1	0	0	1	0	0	0	1	0	0	1	0	0	0	0	0	1	1	1	1	1	1	1	1	0	0
30	1	0		24	0	0	2	11	28	1	1	32	2	1	0	1	1	2	0	0	0	0	0	1	0	0	0					0	0	1	0	0	0	0	0	1	0	1	0	1	1	1	1	1	1
31	1	0		39	0	0	3	11	19	1	1	21	1	1	0	1	1	4	0	0	0	0	0	1	0	0	0					0	0	1	0	0	0	0	0	1	0	1	0	1	0	0	0	1	0
32	1	0		24	0	0	2	11	18	1	2	24	1	0		1	1	4	0	0	0	0	1	0	0	0	0					1	0	1	0	0	0	0	0	1	0	1	0	1	1	1	1	1	1
33	1	0		39	0	0	3	11	24	1	1	34	1	1	0	1	1	4	0	0	0	0	0	0	0	0	0					0	0	1	1	0	0	0	1	1	1	1	1	1	1	1	1	0	1
34	1	0		40	0	0	3	11	33	1	1		0	99		0	0	4	0	0	0	0	0	1	0	0	0					1	0	1	0	0	0	0	0	1	0	1	0	0	1	1	1	1	1
35	1	0		25	0	0	2	11	30	1	2	33	2	1	0	1	1	4	1	0	0	0	0	0	0	0	0					0	0	1	0	0	0	0	0	1	0	0	0	0	1	1	1	1	1
36	1	1	0	36	0	1	3	11	23	1	1	26	1	0		1	1	4	1	0	0	0	0	0	0	0	0					0	0	1	1	0	0	0	1	1	1	1	1	1	0	1	1	1	0
37	1	0		10	0	0	1	11	22	1	3	27	2	1	0	1	1	2	0	0	0	0	0	0	0	1	0					0	0	1	0	0	0	0	0	1	0	1	1	1	1	1	1	1	0
38	1	0		34	0	0	3	11	19	1	2	20	3	0		0	1	2	1	0	0	0	0	0	0	0	0					1	0	1	1	0	0	0	1	1	0	1	0	1	1	1	1	1	0
39	1	0		36	0	0	3	11	19	1	3	20	1	1	0	1	1	2	1	0	0	0	0	0	0	0	0					0	0	0	0	0	0	0	0	1	0	1	0	1	0	0	0	0	1
40	1	0		34	0	0	3	11	37	1	1	35	1	0		1	1	4	0	0	0	0	0	1	0	0	0					0	0	1	0	0	0	0	0	1	0	1	0	1	1	1	1	1	0
41	1	0		25	0	0	2	11	28	1	1		1	1	0	1	1	4	0	0	0	0	0	1	0	0	1	0	0	0	1	0	0	1	1	0	0	0	1	1	1	0	1	1	1	1	1	1	1
42	1	0		10	0	0	1	11	24	1	1	29	1	0		1	1	4	1	0	0	0	0	0	0	0	1	0	0	0	1	0	0	1	0	0	0	0	0	1	1	0	1	0	0	0	0	0	0
43	1	0		33	0	0	3	11	24	1	1	27	1	0		0	0	4	0	0	0	0	0	1	0	0	1	0	0	0	1	1	0	1	1	0	0	0	1	1	1	1	1	1	1	1	1	1	1
44	1	0		39	0	0	3	11	36	1	3	38	2	1	0	1	1	2	1	0	0	0	1	0	0	1	1	0	0	0	1	0	0	1	0	0	0	0	0	1	0	1	0	1	1	1	1	1	1
45	1	0		38	0	0	3	11	24	1	1	32	1	1	0	1	1	4	0	0	0	0	0	1	0	0	1	0	0	1	0	0	0	1	1	0	0	0	1	1	1	1	1	0	1	1	1	1	1
46	1	0		34	0	0	3	11	16	1	1	18	1	1	0	1	1	2	1	0	0	0	0	0	0	0	0					0	0	1	0	0	0	0	0	1	0	1	0	1	1	1	1	1	0
47	1	0		28	0	0	2	11	27	1	1	31	1	1	0	1	2	4	1	0	0	0	0	0	0	0	0					0	0	1	0	0	0	0	0	1	1	0	1	1	1	1	1	1	0
48	1	0		19	0	0	1	11	26	1	2	29	1	99		1	1	4	0	0	0	0	0	1	0	0	1	0	0	0	1	0	0	1	0	0	0	0	0	1	0	1	0	1	1	1	1	1	0
49	1							11	20	1	1	23	1	99		1	1	2	1	0	0	0	0	0	0	0	0					0	1	0	0	0	0	0	0	0	0	0	0	0	0	0	0	0	1
50	1	0		35	0	0	3	11	21	1	2	34	1	1	0	1	1	4	0	0	0	0	0	1	0	0	0					0	0	1	1	0	0	0	1	1	0	1	0	1	1	1	1	1	0
51	1	0		37	0	0	3	11	29	1	1	38	1	0		1	1	4	0	0	0	0	0	1	0	0	1	0	0	0	1	0	0	1	0	0	0	0	0	1	0	1	0	1	0	1	1	1	1
52	1	0		13	0	0	1	11	21	1	1	33	0	1	0	1	1	4	0	0	0	0	0	0	0	1	1	0	0	0	1	0	0	1	1	0	0	0	1	1	1	1	1	1	1	1	1	1	0
53	1	0		19	0	0	1	11	21	1	2	29	3	1	0	1	1	4	0	0	0	0	0	1	0	0	0					1	0	1	0	0	0	0	0	1	0	1	0	1	1	1	1	1	1
54	1	0		23	0	0	2	11	29	1	1		0	99		1	2	4	0	0	0	0	0	1	0	0	1	0	0	0	1	0	0	1	0	0	0	0	0	1	1	1	1	1	1	1	1	1	1
55	1	0		8	0	0	1	11	18	1	1	23	1	0		1	1	4	1	0	0	0	0	0	0	0	0					0	0	1	0	0	0	0	0	1	1	1	1	1	1	1	1	1	1
56	1	0		10	0	0	1	11	19	1	2	20	3	1	0	1	1	4	0	0	0	0	0	0	0	0	0					0	0	1	0	0	0	0	0	1	1	0	1	1	1	1	0	0	0
57	1	0		14	0	0	1	11	17	1	2		2	1	0	1	1	4	0	0	0	0	0	0	0	1	0					0	0	1	1	0	0	0	1	1	1	1	1	1	1	1	0	1	1
58	1	0		36	0	0	3	11	32	1	1	32	0	1	0	1	1	2	1	0	0	0	0	0	0	0	0					0	0	1	0	0	0	0	0	1	0	1	0	1	1	1	1	1	1
59	1	0		27	0	0	2	11	34	1	1	47	1	1	0	0	1	2	0	0	0	0	0	1	0	0	0					0	0	1	1	0	0	0	1	1	0	1	0	1	1	1	1	1	1
60	1	1	0	22	0	1	2	11	22	1	3	25		1	0	1	1	4	1	0	0	0	0	0	0	0	0					0	0	1	0	0	0	0	0	1	0	1	0	1	0	1	1	1	0
61	1	0		24	0	0	2	11	29	1	1	30	1	0		0	1	4	0	0	0	0	0	1	0	0	0					1	0	1	1	0	0	0	1	1	0	1	0	1	1	1	1	1	1
62	1	0		4	0	0	1	11	18	1	2	24	2	1	0	1	1	2	1	0	0	0	0	0	0	0	0					1	0	1	0	0	0	0	0	1	1	1	1	1	1	1	1	1	1
63	1	0		29	0	0	3	11	42	1	2	42	1	1	1	1	1	2	1	0	0	0	0	0	0	0	0					0	0	1	0	0	0	0	0	1	0	1	0	1	1	1	1	1	1
64	1	0		14	0	0	1	11	23	1	1	25	1	1	0	0	1	4	0	0	0	0	0	1	0	0	0					0	0	1	0	0	0	0	0	1	0	1	0	1	1	1	1	1	0
65	1	0		37	0	0	3	11	26	1	1	29	0	1	0	1	1	2	0	0	0	0	0	1	0	0	0					0	0	1	0	0	0	0	0	1	0	1	0	1	1	1	1	1	1
66	1	0		14	0	0	1	11	36	1	2	45	3	1	0	1	1	2	1	0	0	0	0	0	0	0	0					1	0	1	0	0	0	0	0	1	0	1	0	1	1	1	1	1	0
67	1	0		16	0	0	1	11	22	1	1	27		0		1	1	4	0	0	0	0	0	0	0	0	0					1	0	1	0	0	0	0	0	1	0	1	0	1	1	1	1	1	0
68	1	0		28	0	0	2	11	17	1	2	22	1	1	0	1	1	4	0	0	0	0	0	1	0	0	0					0	0	1	0	0	0	0	0	1	0	0	0	0	1	1	1	1	1
69	1	0		20	0	0	1	11	24	1	1	28	0	1	0	1	1	4	0	0	0	0	0	0	0	1	0					1	0	1	1	0	0	0	1	1	1	0	0	0	1	1	1	0	1
70	1	0		39	0	0	3	11	31	1	2	33	3	1	1	1	1	2	1	0	0	0	0	0	0	0	0					1	0	1	0	0	0	0	0	1	1	1	1	1	1	1	1	1	1
71	1	0		24	0	0	2	12	19	1	2	23	1	0		1	1	4	0	0	0	0	0	1	0	0	0					1	0	1	0	0	0	0	0	1	0	0	0	0	0	0	0	1	1
72	1	0		32	0	0	3	12	24	1	2	26	1	1	0	1	1	3	0	0	0	0	1	0	0	1	0					1	0	1	0	0	0	0	0	1	0	0	0	0	0	0	0	1	1
73	1	0		18	0	0	1	12	24	1	2	30	1	1	0	1	1	2	1	0	0	0	1	0	0	1	1	0	0	0	1	0	0	1	0	0	0	0	0	1	0	1	1	1	0	0	0	1	1
74	1	0		38	0	0	3	12	29	5	1		0	1	0	0	0	4	1	0	0	0	0	0	0	1	0					1	0	1	0	0	0	0	0	1	0	0	1	0	0	0	0	1	1
75	1	0		32	0	0	3	12	17	1	2	21	1	0		1	1	4	0	0	0	0	1	0	0	0	0					1	0	1	0	0	0	0	0	1	0	1	0	0	0	0	0	1	1
76	1	0		22	0	0	2	12	28	1	2	32	1	1	0	0	1	2	1	0	0	0	0	0	0	0	1	0	0	0	1	1	0	1	0	0	0	0	0	1	0	1	0	1	0	0	0	1	0
77	1	0		34	0	0	3	12	28	1	1	31	0	99		0	0	4	0	0	0	0	1	0	0	1	0					1	0	1	0	0	0	0	0	1	1	1	1	1	0	0	0	1	1
78	1	0		38	0	0	3	12	30	1	1	34	3	1	0	1	1	4	0	0	0	0	1	0	0	1	1	0	0	0	1	0	0	1	0	0	0	0	0	1	0	1	0	0	0	0	0	1	1
79	1	0		32	0	0	3	12	31	1	1	35	0	1	1	1	1	2	0	0	0	0	1	0	0	1	1	0	0	0	1	0	0	1	0	0	0	0	0	1	0	1	0	1	0	0	1	1	1
80	1	0		32	0	0	3	12	20	1	2	22	1	1	0	1	1	3	0	1	0	0	1	0	0	1	0					1	0	1	0	0	0	0	0	1	0	1	0	1	0	0	0	1	1
81	1	0		28	0	0	2	12	24	1	2	25	1	0		1	1	2	1	0	0	0	1	0	0	1	1	0	0	0	1	1	0	1	0	0	0	0	0	1	0	1	0	1	0	0	0	1	1
82	1							12	20	1	1		1	0		1	1	4	0	0	0	0	0	1	0	0	0					0	1	0	0	0	0	0	0	0	0	0	0	0	0	0	0	0	1
83	1	0		20	0	0	1	12	17	1	2		2	99		1	1	4	0	0	0	0	1	0	0	1	0					1	0	1	0	0	0	0	0	1	0	1	0	1	0	0	0	1	1
84	1	0		24	0	0	2	12	20	1	2	20	2	1	0	1	1	4	0	0	0	0	0	0	0	1	0					1	0	1	1	0	0	0	1	1	0	1	0	1	0	0	0	1	1
85	1	0		32	0	0	3	12	21	1	1	36	2	0		0	1	4	0	0	0	0	0	1	0	0	0					0	0	1	0	0	0	0	0	1	0	0	0	0	0	0	0	1	1
86	1	0		20	0	0	1	12	19	1	1	23	1	0		1	1	4	0	0	0	0	0	1	0	0	0					1	0	1	0	0	0	0	0	1	0	0	0	0	0	0	0	1	1
87	1	0		28	0	0	2	12	19	1	1	24	1	1	0	0	1	1	1	0	0	0	0	0	0	0	0					1	0	1	0	0	0	0	0	1	0	1	0	0	0	0	0	1	1
88	1	0		28	0	0	2	12	22	1	2		1	1	0	0	1	4	0	0	0	0	0	1	0	0	0					1	0	1	0	0	0	0	0	1	0	1	0	1	0	0	0	1	1
89	1	0		26	0	0	2	12	27	1	1	34	0	1	0	1	1	4	0	0	0	0	0	1	0	0	0					0	0	1	0	0	0	0	0	1	0	1	0	1	0	0	0	1	1
90	1	0		20	0	0	1	12	30	1	1	35	1	0		1	1	4	0	0	0	0	1	0	0	0	0					1	0	1	0	0	0	0	0	1	0	1	0	1	0	0	0	1	1
91	1	0		26	0	0	2	12	20	1	1	28	1	1	0	1	1	4	0	0	0	0	0	1	0	0	0					0	0	1	0	0	0	0	0	1	0	1	0	1	0	0	0	1	1
92	1	1	1	16	1	0	1	12	30	1	2	32	2	1	0	1	1	4	0	0	0	0	1	0	0	0	1	0	0	0	1	0	0	1	0	0	0	0	0	1	0	0	0	0	0	0	0	0	1
93	1	0		32	0	0	3	12	15	3	1	24	1	99		1	1	4	0	0	0	0	0	0	0	0	0					1	0	1	0	0	0	0	0	1	0	1	0	1	0	0	0	1	1
94	1							12	22	1	2		1	1	0	1	1	4	0	0	0	0	1	0	0	0	1	0	0	0	1	1	1
95	1	0		14	0	0	1	12	24	1	2	27	1	1	0	1	1	4	0	0	0	0	1	0	0	0	1	0	0	0	1	1	0	1	0	0	0	0	0	1	0	1	0	1	0	0	0	1	1
96	1	0		28	0	0	2	12	25	1	2		1	99		0	1	3	0	0	0	0	0	0	0	0	0					1	0	0	0	0	0	0	0	1	0	0	0	0	0	0	0	1	1
97	1	0		24	0	0	2	12	20	1	2	27	1	99		1	1	3	0	0	0	0	0	0	0	0	0					1	0	1	1	0	0	0	1	1	0	1	0	0	0	0	0	1	0
98	1	0		7	0	0	1	12	17	1	2		1	1	0	1	1	2	0	0	0	0	0	0	0	0	0					0	0	0	0	0	0	0	0	1	0	0	0	0	0	0	0	1	0
99	1	0		34	0	0	3	12	25	1	2	27	2	1	0	1	1	2	0	0	0	0	1	0	0	0	1	0	0	0	1	1	0	1	1	0	0	0	1	1	0	1	0	1	0	0	0	1	1
100	1	0		26	0	0	2	12	18	1	2	25	2	0		1	1	4	0	0	0	0	0	1	0	0	1	0	0	0	1	1	0	1	1	0	0	0	1	1	0	1	0	1	0	0	0	1	1
101	1	0		32	0	0	3	12	27	1	1	30	0	1	0	1	1	4	0	0	0	0	0	1	0	0	0					1	0	1	0	0	0	0	0	1	0	1	0	1	0	0	0	1	1
102	1	1	1	22	1	0	2	12	22	1	2		1	1	0	1	1	4	0	0	0	0	0	0	0	1	0					1	0	0	1	0	0	0	1	1	0	0	0	0	0	0	0	0	1
103	1	0		33	0	0	3	12	35	1	1		0	99		1	1	2	0	0	0	0	0	1	0	0	0					0	0	1	0	0	0	0	0	1	0	1	0	0	0	0	0	1	0
104	1	0		29	0	0	3	12	18	1	2	26	1	0		1	1	4	0	0	0	0	0	1	0	0	0					0	0	1	0	0	0	0	0	1	0	1	0	0	0	0	0	1	1
105	1	0		29	0	0	3	12	22	1	1	35	0	0		1	1	4	0	0	0	0	0	1	0	0	0					0	0	1	0	0	0	0	0	1	0	1	0	0	0	0	0	1	0
106	1	0		32	0	0	3	12	21	1	2	21	3	1	0	0	1	4	0	0	0	0	0	0	0	1	0					1	0	1	0	0	0	0	0	1	1	1	1	0	0	0	0	1	0
107	1	0		28	0	0	2	12	18	1	2	30	0	0		1	1	2	0	0	0	0	0	0	0	1	0					1	0	1	0	0	0	0	0	1	0	0	0	0	0	0	0	1	1
108	1	1	1	28	1	0	2	12	18	1	1	24	1	0		0	1	4	0	0	0	0	0	1	0	0	0					1	0	0	0	0	0	0	0	1	0	0	0	0	0	0	0	0	1
109	1	0		32	0	0	3	12	29	1	1	32	0	0		1	1	3	0	0	0	0	0	1	0	0	0					1	0	1	0	0	0	0	0	1	0	1	0	1	0	0	0	1	1
110	1	0		28	0	0	2	12	23	1	1		1	0		1	1	3	0	0	0	0	0	1	0	0	1	0	0	0	1	1	0	1	0	0	0	0	0	1	0	1	0	1	0	0	0	1	1
111	1	0		28	0	0	2	12	19	1	3	21	1	1	0	1	1	1	0	0	0	0	0	0	0	1	1	0	0	0	1	1	0	1	0	0	0	0	0	1	0	1	1	1	0	0	0	1	1
112	1	0		32	0	0	3	12	29	1	1	32	0	0		1	1	3	0	0	0	0	0	1	0	0	1	0	0	0	1	1	0	1	0	0	0	0	0	1	0	1	0	0	0	0	0	1	1
113	1	0		14	0	0	1	12	22	1	2	28	1	1	0	1	1	4	0	0	0	0	0	0	0	0	1	0	0	0	1	1	0	1	0	0	0	0	0	1	0	1	0	0	0	0	0	1	1
114	1	0		32	0	0	3	13	31	1	1	38	1	0		1	1	4	0	0	0	0	1	0	0	0	0					1	0	1	0	0	0	0	0	1	0	1	0	1	0	1	0	1	0
115	1	0		28	0	0	2	13	28	1	3	31	3	99		1	1	4	1	0	0	0	1	0	0	0	1	0	1	0	0	1	0	1	0	0	0	0	0	1	0	1	0	0	0	0	0	1	1
116	1	0		34	0	0	3	13	18	1	2	22	2	99		0	1	2	0	0	0	0	0	0	0	1	0					1	0	1	0	0	0	0	0	1	0	0	0	0	0	1	0	0	0
117	1	0		36	0	0	3	13	18	1	2	23	1	1	0	1	1	4	1	0	0	0	0	0	0	0	0					1	0	1	1	0	0	0	1	1	0	1	0	1	0	0	0	1	0
118	1	0		26	0	0	2	13	20	1	2	25	2	1	0	1	1	4	0	0	0	0	0	0	0	0	0					1	0	1	0	0	0	0	0	1	0	0	0	1	1	1	0	1	1
119	1	0		22	0	0	2	13	20	1	2	23	1	0		1	1	4	0	0	0	0	1	0	0	1	0					1	0	1	1	0	0	0	1	1	0	0	0	0	0	0	0	1	0
120	1	0		30	0	0	3	13	23	1	2	24	2	1	0	1	1	4	0	0	0	0	1	0	0	1	0					1	0	1	0	0	0	0	0	1	0	1	0	1	0	0	0	1	0
121	1	0		28	0	0	2	13	21	1	2	23	3	1	0	1	1	4	0	0	0	0	0	0	0	1	1	0	0	0	1	1	0	1	1	0	0	0	1	1	0	0	0	0	0	0	0	0	0
122	1	0		36	0	0	3	13	18	1	2	20	3	0		1	1	4	0	0	1	0	0	0	0	1	0					1	0	0	1	0	0	0	1	1	0	0	0	1	0	0	0	1	1
123	1	0		25	0	0	2	13	34	1	1	42	0	0		1	2	4	0	0	0	0	0	1	0	0	1	0	0	0	1	1	0	1	0	0	0	0	0	0	0	0	0	0	0	0	0	1	1
124	1	0		7	0	0	1	13	29	1	2	31	2	1	0	1	1	4	0	0	0	0	0	0	0	1	1	0	0	0	1	1	0	1	1	0	0	0	1	1	0	1	0	1	1	1	1	1	0
125	1	1	0	36	0	1	3	13	17	3	2	22	2	1	0	0	1	2	1	0	0	0	0	0	0	0	0					1	0	1	1	0	0	0	1	1	1	0	0	1	0	0	0	1	1
126	1	1	1	35	1	0	3	13	21	1	2	28	1	1	0	1	1	4	0	0	0	0	1	0	0	1	1	0	0	0	1	1	0	0	0	0	0	0	0	0	0	0	0	1	0	0	0	0	0
127	1	0		12	0	0	1	13	22	1	2	23	2	1	0	1	1	2	1	0	0	0	1	0	0	1	1	0	0	0	1	1	0	1	0	0	0	0	0	1	0	1	0	1	0	0	0	1	0
128	1	0		16	0	0	1	13	33	1	2	36	1	1	0	1	1	1	0	0	0	0	1	0	0	1	1	0	0	0	1	1	0	1	0	0	0	0	0	1	0	1	0	1	0	0	0	1	0
129	1	0		40	0	0	3	13	21	1	2	25	2	1	0	1	1	4	0	0	0	0	0	1	0	0	0					1	0	1	0	0	0	0	0	1	0	1	0	1	0	1	0	1	1
130	1	0		13	0	0	1	13	26	1	2	38	1	1	0	1	1	4	1	0	0	0	0	0	0	0	0					1	0	1	0	0	0	0	0	1	0	1	0	0	0	1	0	1	0
131	1	0		10	0	0	1	13	18	1	1	20	1	1	0	1	2	4	1	0	0	0	0	0	0	1	0					1	0	1	0	0	0	0	0	1	0	0	0	0	0	1	0	1	1
132	1	0		27	0	0	2	13	18	1	1	25	0	1	0	0	1	4	0	0	0	0	1	0	0	1	0					1	0	1	0	0	0	0	0	1	0	0	0	0	0	1	0	1	1
133	1	0		26	0	0	2	13	34	1	3	37	3	1	0	1	1	4	0	0	1	0	1	0	0	1	1	0	0	0	1	1	0	1	1	0	0	0	1	1	0	0	0	1	1	1	0	1	0
134	1	0		36	0	0	3	13	18	1	2	23	2	1	0	1	1	2	1	0	0	0	0	0	0	1	0					1	0	0	0	0	0	0	0	0	0	1	1	1	0	0	0	0	0
135	1	0		40	0	0	3	13	27	1	3	29	3	0		1	1	2	1	0	0	0	1	0	0	0	0					1	0	1	0	0	0	0	0	1	0	1	0	1	0	0	0	1	0
136	1	0		10	0	0	1	13	19	1	2	28	1	1	0	1	1	4	0	0	0	0	1	0	0	1	0					0	0	1	1	0	0	0	1	1	0	1	0	1	0	0	0	1	1
137	1	0		32	0	0	3	13	20	1	2	24	2	0		1	1	3	1	0	0	0	1	0	0	1	1	0	0	0	1	1	0	1	0	0	0	0	0	1	0	1	0	1	0	1	0	1	1
138	1	0		27	0	0	2	13	19	1	2	21	1	1	0	1	1	4	1	0	0	0	1	0	0	1	1	0	0	0	1	1	0	1	0	0	0	0	0	1	0	1	0	1	0	1	0	1	0
139	1	0		38	0	0	3	13	42	1	1	44	1	1	0	1	1	4	1	0	0	0	1	0	0	1	1	0	0	0	1	1	0	1	0	0	0	0	0	1	0	1	0	1	0	0	0	1	0
140	1	0		32	0	0	3	13	18	3	2	20		99		0	1	2	1	0	0	0	0	0	0	1	0					1	0	1	0	0	0	0	0	1	0	1	0	1	0	1	0	1	0
141	1	0		26	0	0	2	13	19	1	2	20	1	1	0	1	1	3	1	0	0	0	0	0	0	1	0					1	0	1	1	0	0	1	0	1	0	1	0	1	0	1	0	1	0
142	1	0		26	0	0	2	13	19	3	2	19	2	99		0	1	2	1	0	0	0	0	0	0	1	0					1	0	0	0	0	0	0	0	1	0	1	0	1	0	0	0	1	0
143	1	0		38	0	0	3	13	37	1	1		0	1	1	1	1	3	1	0	0	0	0	0	0	0	0					1	0	1	0	0	0	0	0	1	0	1	0	1	0	0	1	1	0
144	1	0		17	0	0	1	13	22	1	2	24	1	1	0	1	1	3	0	0	0	0	1	0	0	1	0					1	0	0	0	0	0	0	0	1	0	0	0	1	0	0	0	1	1
145	1	0		26	0	0	2	13	22	1	3	34	3	1	0	1	1	4	0	0	0	0	1	0	0	1	0					1	0	1	0	0	0	0	0	1	0	1	0	0	1	1	0	1	0
146	1	0		28	0	0	2	13	24	1	2	28	2	99		1	1	3	1	0	0	0	0	0	0	1	1	0	0	0	1	1	0	1	1	0	0	0	1	1	0	1	0	1	0	1	0	1	0
147	1							13	20	1	2	30	2	1	0	1	1	4	1	0	0	0	0	0	0	1	0					1	1
148	1	0		21	0	0	2	13	32	1	1		1	0		0	1	4	0	0	0	0	0	1	0	0	1	0	0	0	1	0	0	1	1	0	0	0	1	1	0	0	0	0	0	0	0	1	0
149	1	0		23	0	0	2	13	16	1	1	21	2	0		1	1	4	0	0	0	0	0	1	0	0	0					1	0	1	0	0	0	0	0	1	0	0	0	1	0	0	0	1	1
150	1	0		29	0	0	3	13	18	1	1	20	1	0		1	1	3	1	0	0	0	0	0	0	1	0					1	0	1	0	0	0	0	0	1	0	1	0	1	0	0	0	0	0
151	1	0		26	0	0	2	13	18	1	1		2	0		1	1	4	0	0	0	0	0	1	0	0	0					0	0	1	0	0	0	0	0	1	0	1	0	1	0	0	0	1	1
152	1	0		18	0	0	1	13	17	1	2	19	1	1	0	1	1	3	1	0	0	0	0	0	0	1	0					1	0	1	0	0	0	0	0	1	0	1	0	1	0	1	0	1	0
153	1	0		23	0	0	2	13	23	1	2	24	2	1	0	1	1	3	1	0	0	0	1	0	0	1	0					1	0	1	0	0	0	0	0	1	0	1	0	1	0	0	0	1	1
154	1	0		26	0	0	2	13	20	1	2	21	3	1	0	1	1	3	1	0	0	0	1	0	0	1	1	0	0	0	1	1	0	1	0	0	0	0	0	1	0	1	1	1	0	0	0	1	0
155	1	0		13	0	0	1	13	24	1	2	35	2	1	0	1	1	4	1	0	0	0	0	0	0	1	1	0	0	0	1	1	0	1	1	0	0	0	1	1	0	0	0	0	1	0	0	1	0
156	1	0		15	0	0	1	13	20	1	2	25	2	0		1	1	4	0	0	0	0	0	1	0	0	0					1	0	1	0	0	0	0	0	1	0	0	0	0	0	1	0	1	1
157	1	0		18	0	0	1	13	21	1	3	27	2	0		1	1	2	0	0	0	0	1	0	0	1	0					1	0	1	0	0	0	0	0	1	0	1	0	1	1	0	0	1	0
158	1	0		16	0	0	1	13	24	1	3	25	2	0		1	1	4	0	0	0	0	0	1	0	0	1	0	0	0	1	1	0	1	0	0	0	0	0	1	0	1	0	1	0	0	0	1	0
159	1	0		12	0	0	1	13	33	1	3		3	1	0	1	1	3	1	0	0	0	0	0	0	0	1	0	0	0	1	0	0
160	1	0		28	0	0	2	13	26	1	3	30	3	0		1	1	4	0	0	0	0	0	0	0	1	0					0	0	1	0	0	0	0	0	1	0	0	0	0	0	1	0	1	0
161	1	0		32	0	0	3	13	20	1	1		1	0		0	1	4	0	0	0	0	0	1	0	0	0					1	0	1	0	0	0	0	0	1	0	0	0	0	0	0	0	1	1
162	1	0		19	0	0	1	13	18	1	1	19	1	0		1	1	4	0	0	0	0	0	1	0	0	0					1	0	1	0	0	0	0	0	1	0	0	0	0	0	1	0	1	1
163	1	0		25	0	0	2	13	19	1	1	23	1	0		1	1	3	1	0	0	0	1	0	0	0	0					1	0	1	0	0	0	0	0	1	0	0	0	0	0	1	0	1	1
164	1	0		32	0	0	3	13	21	1	1	26	1	1	0	0	1	2	1	0	0	0	0	0	0	0	0					1	0	1	0	0	0	0	0	1	0	0	0	1	0	0	0	1	0
165	1	0		14	0	0	1	13	20	1	2	23	1	1	0	1	1	2	1	0	0	0	0	0	0	0	1	0	0	0	1	1	0	1	1	0	0	0	1	1	0	0	0	0	0	1	0	1	0
166	1	0		18	0	0	1	13	19	1	2	24	1	1	0	1	1	4	1	0	0	0	0	0	0	1	0					1	0	1	0	0	0	0	0	1	0	1	0	1	0	0	0	1	1
167	1	0		12	0	0	1	13	21	1	1	30	1	0		1	1	4	1	0	0	0	1	0	0	0	0					1	0	1	0	0	0	0	0	1	0	0	0	0	0	0	0	1	1
168	1	0		10	0	0	1	13	22	1	2	39	1	1	0	1	1	3	1	0	0	0	1	0	0	1	1	0	0	0	1	1	0	1	0	0	0	0	0	1	0	0	0	0	0	1	0	1	0
169	1	0		13	0	0	1	13	28	1	1	35	1	1	0	1	1	4	1	0	0	0	1	0	0	1	1	0	0	0	1	1	0	1	1	0	0	0	1	1	0	1	0	1	0	1	0	1	0
170	1	0		10	0	0	1	13	30	1	3	38	3	1	0	1	1	3	0	0	0	0	1	0	0	0	1	0	0	0	1	1	0	1	0	0	0	0	0	1	0	1	0	1	1	0	0	1	0
171	1	0		19	0	0	1	13	26	3	3	28	3	99		0	1	3	1	0	0	0	0	0	0	0	0					1	0	1	0	0	0	0	0	1	0	1	0	1	0	1	0	1	0
172	1	0		21	0	0	2	13	32	1	3	32	3	0		1	1	4	0	0	0	0	1	0	0	1	1	0	0	0	1	1	0	1	0	0	0	0	0	1	0	1	0	0	0	1	0	1	0
173	1	0		32	0	0	3	13	27	1	3	27	3	1	0	1	1	2	1	0	1	0	1	0	0	1	1	0	0	0	1	1	0	1	0	0	0	0	0	1	0	0	0	1	0	1	0	1	0
174	1	0		12	0	0	1	13	18	1	2	22	2	0		1	1	4	0	0	0	0	0	0	0	1	0					1	0	0	0	0	0	0	0	1	0	1	0	0	0	0	0	0	0
175	1	0		27	0	0	2	13	18	1	2		1	1	0	1	1	4	0	0	0	0	0	1	0	0	1	0	0	0	1	1	0	0	0	0	0	0	0	1	0	1	0	1	0	0	0	1	0
176	1	0		32	0	0	3	13	23	1	1	30	1	1	0	0	1	4	1	0	0	0	0	0	0	1	0					1	0	1	0	0	0	0	0	1	0	0	0	0	0	0	0	1	0
177	1	0		6	0	0	1	13	26	1	2	27	1	0		1	1	4	0	0	0	0	0	0	0	1	0					1	0	1	0	0	0	0	0	1	0	0	0	0	0	0	0	1	0
178	1	0		25	0	0	2	13	18	1	1	19	1	1	0	1	1	4	0	0	0	0	0	0	0	1	0					1	0	1	0	0	0	0	0	1	0	0	0	1	0	0	0	1	0
179	1	0		13	0	0	1	13	27	1	0	32		1	0	1	1	3	0	0	0	0	0	0	0	1	0					1	0	1	1	0	0	0	1	1	0	0	0	1	0	1	0	1	0
180	1	0		23	0	0	2	13	19	1	2	23	1	0		0	1	2	1	0	0	0	0	0	0	1	0					1	0	1	0	0	0	0	0	1	0	0	0	0	0	0	0	1	0
181	1	0		22	0	0	2	13	20	1	1		1	99		0	1	2	1	0	0	0	0	0	0	1	0					1	0	1	0	0	0	0	0	1	0	1	0	1	0	1	0	1	0
182	1	0		11	0	0	1	13	24	2	3	25	3	1	0	1	1	3	1	1	0	0	0	0	0	1	0					1	0	1	0	0	0	0	0	1	0	0	0	0	0	1	0	1	1
183	1	0		26	0	0	2	13	21	1	3	22	1	1	0	1	1	4	0	0	0	0	0	0	0	1	0					1	0	1	0	0	0	0	0	1	0	0	0	0	1	0	0	1	0
184	1	0		15	0	0	1	13	21	1	2	32	3	99		1	1	3	1	0	0	0	0	0	0	1	0					1	0	1	1	0	0	0	1	1	0	1	0	1	1	1	0	1	1
185	1	0		15	0	0	1	13	21	1	2	26	3	1	0	1	1	3	1	0	0	0	0	0	0	1	0					1	0	1	1	0	0	0	1	1	0	0	0	0	0	0	0	1	0
186	1	0		18	0	0	1	13	21	1	3	23	3	1	0	1	1	2	1	1	0	0	1	0	0	1	0					1	0	1	1	0	0	0	1	1	0	1	0	0	0	1	0	1	0
187	1	0		10	0	0	1	13	18	1	1		1	1	0	1	1	4	0	0	0	0	0	1	0	0	0					1	0	1	0	0	0	0	0	1	0	0	0	0	0	1	0	1	0
188	1	0		31	0	0	3	13	18	3	2			99		1	2	1	1	0	0	0	0	0	0	1	0					1	0	1	0	0	0	0	0	1	1	1	1	1	0	1	0	1	0
189	1	0		30	0	0	3	13	18	1	3	21	3	1	0	1	1	2	0	0	0	0	0	0	1	0	0					1	0	1	0	0	0	0	0	1	0	1	0	0	0	0	0	1	1
190	1	0		28	0	0	2	13	24	1	2	24	1	1	0	1	1	4	0	0	0	0	1	0	0	1	0					1	0	1	0	0	0	0	0	1	0	1	0	0	1	1	0	1	0
191	1	0		12	0	0	1	13	17	3	2			99		1	1	4	0	0	0	0	0	0	1	0	0					0	0	0	0	0	0	0	0	1	0	1	1	1	0	1	0	1	0
192	1	0		9	0	0	1	13	21	1	2	23	1	1	0	1	1	4	0	0	0	0	1	0	0	0	0					0	0	1	0	0	0	0	0	1	0	1	0	1	0	1	0	1	0
193	1	0		36	0	0	3	13	21	1	3	24	1	1	0	0	0	4	0	0	0	0	0	1	0	0	0					1	0	1	0	0	0	0	0	1	0	0	0	0	0	1	0	1	0
194	1	0		28	0	0	2	13	19	1	1	31	0	1	0	1	1	4	0	0	0	0	1	0	0	0	0					1	0	1	0	0	0	0	0	1	0	1	0	1	0	0	0	1	0
195	1	0		14	0	0	1	13	18	3	3	22	3	1	0	0	0	2	0	0	0	0	0	0	1	1	0					1	0	1	0	0	0	0	0	1	0	1	0	0	0	1	0	1	0
196	1	0		16	0	0	1	13	29	1	1		1	1	0	1	1	3	0	0	0	0	1	0	0	0	0					1	0	1	0	0	0	0	0	1	0	1	0	1	1	0	0	1	0
197	1	0		8	0	0	1	13	18	1	1	22	1	99		0	0	3	0	0	0	0	0	1	0	0	0					1	0	1	0	0	0	0	0	1	0	1	0	0	1	1	0	1	0
198	1	0		23	0	0	2	13	27	1	2	30	2	99		1	1	3	0	0	0	0	0	0	0	1	0					1	0	1	0	0	0	0	0	1	0	0	0	0	0	1	0	1	0
199	1	0		8	0	0	1	13	19	1	2	21	1	1	0	1	1	3	0	0	0	0	0	0	0	1	0					1	0	1	0	0	0	0	0	1	0	0	0	0	0	1	0	1	0
200	1							13	34	4	2	36		1	0	1	1	3	0	0	0	0	0	1	0	0	0					1	1
201	1	0		16	0	0	1	13	20	1	1	27	1	0		1	1	4	0	0	0	0	0	1	0	0	0					1	0	1	0	0	0	0	0	1	0	0	0	0	0	1	0	1	1
202	1	0		4	0	0	1	13	19	1	1	22	3	99		1	1	4	0	0	0	0	0	0	0	1	0					1	0	0	0	0	0	0	0	1	0	0	0	0	0	0	0	1	0
203	1	0		21	0	0	2	13	24	1	1		2	1		1	1	4	0	0	0	0	0	1	0	0	0					1	0	0	0	0	0	0	0	1	0	1	0	1	0	0	0	1	0
204	1	0		14	0	0	1	13	19	1	1	20	2	1	0	1	1	4	0	0	0	0	1	0	0	0	0					1	0	1	0	0	0	0	0	1	0	1	0	1	0	1	0	1	0
205	1	0		17	0	0	1	13	19	1	2	20	1	1	0	1	1	4	0	0	0	0	1	0	0	1	0					1	0	1	0	0	0	0	0	1	0	1	0	1	0	1	0	1	0
206	1	0		40	0	0	3	14	19	3	3	20	2	99		0	0	3	1	0	0	0	0	0	0	1	0					1	0	0	0	0	0	0	0	1	0	0	0	1	0	0	0	0	1
207	1	0		36	0	0	3	14	27	1	2	32	3	1	0	1	1	3	1	0	0	0	1	0	0	1	0					1	0	1	0	0	0	0	0	1	0	1	0	1	0	0	0	1	0
208	1	0		28	0	0	2	14	26	1	1	37	0	1	0	1	1	2	1	0	0	0	0	0	0	1	1	1	0	0	1	1	0	1	0	0	0	0	0	1	0	1	0	0	0	0	0	0	0
209	1	0		32	0	0	3	14	23	1	3	28	2	1	0	1	1	2	1	0	0	0	1	0	0	1	0					1	0	1	0	0	0	0	0	1	1	0	1	0	0	0	0	0	0
210	1	0		28	0	0	2	14	24	1	2	25	2	1	0	1	1	3	1	0	0	0	1	0	0	0	0					0	0	1	0	0	0	0	0	1	1	0	1	0	0	0	0	1	0
211	1	0		36	0	0	3	14	20	1	2	26	1	1	0	1	1	4	1	0	0	1	0	0	0	1	0					1	0	1	0	0	0	0	0	1	0	0	0	0	0	0	0	0	1
212	1	0		38	0	0	3	14	19	3	2		3	99		0	2	3	1	0	0	0	0	0	0	1	1	0	0	0	1	1	0	0	1	0	0	1	1	1	1	0	0	0	0	0	0	0	0
213	1	0		32	0	0	3	14	23	1	2	30	1	1	0	1	1	4	1	0	0	0	0	0	0	1	1	0	0	0	1	1	0	1	0	0	0	0	0	0	0	1	0	1	0	0	0	0	0
214	1	0		32	0	0	3	14	19	1	1	23	1	0		1	1	3	1	0	0	0	0	0	0	1	1	0	0	0	1	1	0	1	0	0	0	0	0	1	0	1	0	1	0	0	0	0	0
215	1	0		28	0	0	2	14	35	1	1	38	1	1	0	1	1	4	1	0	0	0	0	0	0	1	1	0	0	0	1	1	0	1	0	0	0	0	0	1	0	1	0	0	0	0	0	1	0
216	1	1	0	26	0	1	2	14	25	1	2	35	0	1	0	1	1	4	1	0	0	0	1	0	0	1	1	0	0	0	1	1	0	1	0	0	0	0	0	1	0	1	0	1	0	0	0	0	1
217	1	0		23	0	0	2	14	29	1	1	40	0	0		1	1	4	1	0	0	0	0	0	0	0	0					1	0	1	0	0	0	0	0	1	0	0	0	0	0	0	0	1	0
218	1	0		28	0	0	2	14	23	1	3	24	1	1	0	1	1	4	1	0	0	0	1	0	0	1	0					1	0	1	0	0	0	0	0	1	0	0	0	0	0	0	0	1	0
219	1	0		28	0	0	2	14	20	1	2	23	1	1	0	1	1	4	1	0	0	0	0	0	0	1	0					0	0	1	0	0	0	0	0	1	1	0	1	0	0	0	0	0	1
220	1	0		10	0	0	1	14	21	1	1	24	1	1	0	1	1	4	0	0	0	0	0	1	0	0	1	0	0	0	1	0	0	1	0	0	0	0	0	1	0	0	1	0	0	0	0	0	1
221	1	0		12	0	0	1	14	19	1	2	25	2	0		1	1	4	0	0	0	0	0	0	0	1	0					0	0	1	0	0	0	0	0	1	0	0	0	0	0	0	0	1	1
222	1	0		28	0	0	2	14	17	1	2	22	1	1	0	1	1	4	0	0	1	0	0	0	0	1	0					1	0	1	0	0	0	0	0	1	0	1	0	1	0	0	0	0	1
223	1	0		26	0	0	2	14	28	1	1	41	1	1	0	1	1	4	0	0	0	0	0	1	0	0	1	0	0	0	1	0	0	1	1	0	0	0	1	1	0	0	0	0	0	0	0	1	0
224	1	0		14	0	0	1	14	23	1	3	38	3	0		1	1	4	0	0	0	0	1	0	0	1	0					0	0	1	0	0	0	0	0	1	0	1	0	0	0	0	0	1	0
225	1	0		27	0	0	2	14	30	1	2	38	1	1	0	1	1	3	1	1	0	0	0	0	0	1	0					0	0	1	0	0	0	0	0	1	1	0	1	0	0	0	0	1	1
226	1	0		28	0	0	2	14	34	1	3	37	3	1	0	1	1	3	0	0	0	0	1	0	0	0	1	0	0	0	1	0	0	1	0	0	0	0	0	1	0	1	0	1	0	0	0	1	1
227	1	0		29	0	0	3	14	24	3	1	24	3	99		0	1	3	0	0	0	0	0	0	0	1	0					1	0	1	0	0	0	0	0	1	1	1	1	1	0	0	0	0	1
228	1	0		38	0	0	3	14	19	1	1	24		1	0	1	1	4	0	0	0	0	0	1	0	0	0					1	0	1	0	0	0	0	0	1	0	1	0	1	0	0	0	0	1
229	1	0		29	0	0	3	14	30	1	2	34	1	1	1	1	1	4	0	0	0	0	1	0	0	0	0					1	0	1	0	0	0	0	0	1	0	0	0	0	0	0	0	0	1
230	1	0		13	0	0	1	14	23	1	2	26	1	0		1	1	3	0	0	0	0	1	0	0	1	0					1	0	1	0	0	0	0	0	1	0	0	0	0	0	0	0	0	0
231	1	0		18	0	0	1	14	16	3	1		3	99		1	1	4	0	0	0	0	0	0	0	1	1	0	0	0	1	1	0	1	0	0	0	0	0	1	0	1	0	1	0	0	0	0	1
232	1	0		28	0	0	2	14	16	1	1	33		0		0	1	4	0	0	0	0	0	0	0	1	0					1	0	1	0	0	0	0	0	1	0	1	0	0	0	0	0	0	0
233	1	0		36	0	0	3	14	19	1	1	26	1	1	0	0	0	4	0	0	0	0	0	1	0	0	0					0	0	1	0	0	0	0	0	1	0	0	0	0	0	0	0	0	1
234	1	0		32	0	0	3	14	20	1	2	23		0		1	1	4	0	0	0	0	0	1	0	0	1	0	0	0	1	1	0	1	0	0	0	0	0	1	0	0	0	0	0	0	0	1	1
235	1	0		28	0	0	2	14	35	1	1	35	1	1	0	1	2	4	0	0	0	0	0	1	0	0	1	0	0	0	1	0	0	1	0	0	0	0	0	1	1	1	1	1	0	0	0	0	1
236	1	0		30	0	0	3	14	21	1	2	23	2	1	0	0	1	4	0	0	0	0	1	0	0	1	0					0	0	1	0	0	0	0	0	1	0	0	0	0	0	0	0	1	0
237	1	0		18	0	0	1	14	26	1	1	30	1	0		1	1	4	0	0	0	0	0	1	0	0	1	0	0	0	1	1	0	1	0	0	0	0	0	1	0	0	0	0	0	1	0	1	1
238	1	0		20	0	0	1	14	30	1	1	39	1	1	0	1	1	4	0	0	0	0	0	1	0	0	0					0	0	1	0	0	0	0	0	1	1	1	0	1	0	0	0	0	1
239	1	0		15	0	0	1	14	20	1	3	25	1	1	0	1	1	4	0	0	0	0	0	0	0	1	0					1	0	1	0	0	0	0	0	1	0	1	0	0	0	0	0	0	0
240	1	0		25	0	0	2	14	23	1	1	31	1	1	0	1	1	4	0	0	0	0	0	0	0	1	1	0	0	0	1	0	0	1	0	0	0	0	0	1	1	1	1	1	0	0	0	1	0
241	1	0		28	0	0	2	14	30	1	2	35	1	1	0	0	1	3	0	0	0	0	0	0	0	1	0					0	0	1	0	0	0	0	0	1	1	0	1	0	0	0	0	0	0
242	1	1	0	28	0	1	2	14	22	1	2	28	1	1	0	1	1	4	0	0	0	0	1	0	0	0	1	0	0	0	1	1	0	1	0	0	0	0	0	1	1	0	1	0	0	0	0	0	1
243	1	0		20	0	0	1	14	14	1	1	32	1	0		1	1	4	0	0	0	0	1	0	0	0	0					1	0	1	0	0	0	0	0	1	0	1	0	0	0	0	0	0	0
244	1							14	28	1	1	32	1	0		1	1	4	0	0	0	0	1	0	0	1	0					1	1	0	0	0	0	0	0	1	0	0	0	0	0	0	0	0	0
245	1	0		32	0	0	3	14	21	1	1	26	1	1	0	1	1	4	0	0	0	0	0	1	0	0	1	0	0	0	1	0	0	1	0	0	0	0	0	1	0	1	0	1	0	0	0	0	0
246	1	1	0	39	0	1	3	14	19	1	2	20	1	1	0	0	1	4	1	1	1	0	1	0	0	0	0					1	0	1	1	0	0	0	1	1	0	0	0	0	0	1	0	1	1
247	1	0		38	0	0	3	14	23	1	1	28	2	1	0	0	1	4	1	0	0	0	0	0	0	0	0					0	0	1	0	0	0	0	0	1	1	1	1	1	0	0	0	0	1
248	1	0		32	0	0	3	14	20	1	1	22	1	1	0	1	1	4	0	0	0	0	0	0	0	1	0					0	0	1	0	0	0	0	0	1	0	0	0	0	0	0	0	0	1
249	1	0		36	0	0	3	14	20	1	2	26	1	1	0	1	2	4	0	0	0	0	0	1	0	0	0					0	0	1	0	0	0	0	0	1	0	0	0	0	0	0	0	0	0
250	1	0		13	0	0	1	14	26	1	2	32	1	0		1	1	4	0	0	0	0	0	1	0	0	1	0	0	0	1	0	0	1	0	0	0	0	0	1	1	0	1	1	0	1	0	0	0
251	1	0		18	0	0	1	14	17	4	1		0	99		1	3	4	0	0	0	0	0	0	0	1	0					1	0	1	0	0	0	0	0	1	1	0	0	0	0	0	0	0	0
252	1	0		28	0	0	2	14	18	1	2			1	0	1	1	4	0	0	0	0	0	0	0	1	0					0	0	1	0	0	0	0	0	1	0	0	0	0	0	0	0	0	1
253	1	0		32	0	0	3	14	17	3	1	20		1	0	1	1	4	0	0	0	0	0	1	0	0	0					1	0	1	0	0	0	0	0	1	0	0	0	0	0	0	0	0	1
254	1	0		28	0	0	2	14	25	1	1	32	1	1	0	1	1	3	0	0	0	0	0	1	0	0	0					0	0	1	1	0	0	0	1	1	0	1	0	1	0	0	0	0	1
255	1	0		36	0	0	3	14	21	1	1	30	0	0		0	1	4	0	0	0	0	0	1	0	0	0					1	0	1	0	0	0	0	0	1	0	1	0	0	0	0	0	0	1
256	1	0		32	0	0	3	14	21	1	1	38	1	0		1	2	4	0	0	0	0	0	0	0	1	1	0	0	0	1	1	0	1	0	0	0	0	0	1	1	1	1	1	0	0	0	0	1
257	1	0		29	0	0	3	14	24	3	1	29	3	99		1	1	4	0	0	0	0	0	1	0	0	0					0	0	1	0	0	0	0	0	1	1	0	0	1	0	1	1	0	0
258	1	0		32	0	0	3	14	20	1	1		1	0		1	1	4	0	0	0	0	0	1	0	0	0					1	0	1	0	0	0	0	0	1	0	0	0	0	0	0	0	0	1
259	1	0		25	0	0	2	14	23	3	2	24	3	0		0	0	2	1	0	0	0	0	0	0	1	0					1	0	1	0	0	0	0	0	1	0	1	0	0	0	0	0	0	0
260	1	0		22	0	0	2	14	23	1	1		0	0		1	1	3	1	0	0	0	0	0	0	0	0					1	0	1	1	0	0	0	1	1	1	0	1	0	0	0	0	0	1
261	1	0		35	0	0	3	14	25	1	1	27	0	0		1	1	2	0	0	0	0	0	0	0	0	0					0	0	1	0	0	0	0	0	1	1	1	0	0	0	0	0	0	1
262	1	0		39	0	0	3	14	16	3	1			99		0	0	4	0	0	0	0	0	1	0	0	0					0	0	0	0	0	0	0	0	0	0	0	0	0	0	0	0	0	1
263	1	0		28	0	0	2	14	25	1	1	28	1	1	0	1	1	4	0	0	0	0	1	0	0	0	0					1	0	1	1	0	0	0	1	1	0	0	0	0	0	0	0	1	0
264	1							14	23	1	1	29	1	1	0	1	1	2	1	0	0	0	0	0	0	1	0					1	1
265	1	0		28	0	0	2	14	24	3	1			0		0	0	4	1	0	0	0	0	0	0	0	0					1	0	1	1	0	0	0	1	1	1	0	1	0	1	0	0	1	1
266	1	0		28	0	0	2	14	20	1	2	24	1	0		1	1	4	1	0	0	0	0	0	0	0	0					0	0	1	0	0	0	0	0	1	1	0	1	0	1	0	0	0	0
267	1	0		28	0	0	2	14	21	1	3	23	3	1	0	1	1	2	0	0	0	0	0	1	0	0	0					1	0	1	1	0	0	0	1	1	0	0	0	0	0	0	0	1	0
268	1	0		28	0	0	2	14	19	1	1	29	1	1	0	1	1	4	1	0	0	0	0	0	0	0	0					0	0	1	1	0	0	0	1	1	1	1	1	1	0	0	0	0	1
269	1	0		29	0	0	3	14	32	1	3	37	2	1	1	1	1	2	1	0	0	0	0	0	0	0	0					1	0	1	0	0	0	0	0	1	1	1	1	1	0	0	0	0	1
270	1	0		36	0	0	3	14	19	3	1		1	99		0	0	2	0	0	0	0	0	0	0	0	0					1	0	1	0	0	0	0	0	1	0	0	0	0	0	0	0	0	1
271	1	0		28	0	0	2	14	20	1	2		1	0		1	1	3	0	0	0	0	0	1	0	0	0					1	0	1	0	0	0	0	0	1	1	1	1	1	0	0	0	0	0
272	1	0		28	0	0	2	14	26	1	1	30	1	0		1	1	2	1	0	0	0	0	0	0	1	0					1	0	1	0	0	0	0	0	1	0	1	0	1	0	0	0	0	0
273	1	0		18	0	0	1	14	20	1	1	23	1	1	0	1	1	4	0	0	0	0	0	1	0	0	0					1	0	1	0	0	0	0	0	1	0	1	0	1	0	0	0	0	1
274	1	0		38	0	0	3	14	26	1	2		1	0		1	1	4	0	0	0	0	0	1	0	0	0					1	0	1	1	0	0	0	1	1	0	0	0	0	1	0	0	0	1
275	1	0		23	0	0	2	14	18	1	2	22	2	0		1	1	4	1	0	0	0	0	0	0	0	0					1	0	1	0	0	0	0	0	1	1	1	1	1	0	0	0	0	1
276	1	0		26	0	0	2	14	21	1	2	24	1	0		1	1	3	0	0	0	0	0	0	0	1	0					0	0	1	1	0	0	0	1	1	0	1	0	0	0	0	0	1	1
277	1	0		28	0	0	2	14	16	1	1	25	2	0		1	1	4	0	0	0	0	0	0	0	1	0					0	0	1	0	0	0	0	0	1	0	1	0	1	0	0	0	0	0
278	1	0		9	0	0	1	14	18	1	2	28	1	1	0	1	1	4	0	0	0	0	1	0	0	1	0					1	0	1	0	0	0	0	0	1	0	1	0	1	0	0	0	0	1
279	1	0		10	0	0	1	14	31	1	1	36	1	1	0	1	1	4	0	0	0	0	0	0	0	1	0					1	0	1	0	0	0	0	0	1	0	1	0	0	0	0	0	0	0
280	1	0		21	0	0	2	14	26	1	2	32	1	0		1	1	4	0	0	0	0	1	0	0	1	0					1	0	1	0	0	0	0	0	1	0	0	0	0	0	0	0	1	1
281	1	0		8	0	0	1	14	24	1	2	26	1	1	0	1	1	3	0	0	0	0	0	0	0	1	0					1	0	1	0	0	0	0	0	1	0	1	0	1	0	0	0	0	0
282	1	0		31	0	0	3	14	19	1	1		0	0		1	1	4	0	0	0	0	0	1	0	0	0					0	0	1	0	0	0	0	0	1	0	0	0	0	0	0	0	0	1
283	1							14	28	1	3	34	3	1	0	1	1	3	0	0	0	0	1	0	0	1	0					1	1	1	0	0	0	0	0	1	0	1	0	1	0	0	0	0	0
284	1							14	21	3	2		1	0		1	1	4	0	0	0	0	0	0	0	1	1	0	0	0	1	0	1	0	0	0	0	0	0	1	1	0	0	0	0	0	0	0	0
285	1	0		14	0	0	1	14	22	1	3	20	2	0		1	1	3	0	0	0	0	0	0	0	1	0					1	0	1	0	0	0	0	0	1	1	1	1	0	0	0	0	0	0
286	1	0		14	0	0	1	14	28	1	1		0	0		1	1	3	0	0	0	0	0	0	0	1	0					1	0	1	1	0	0	0	1	1	0	0	0	0	0	0	0	1	0
287	1	0		20	0	0	1	14	22	1	2	36	1	1	0	1	1	3	0	0	0	0	1	0	0	1	1	0	0	0	1	1	0	1	0	0	0	0	0	1	0	0	0	0	0	0	0	1	0
288	1							14	25	3	3	23	3	1	0	0	1	4	0	0	0	0	0	0	0	1	1	0	0	0	1	1	1
289	1	0		25	0	0	2	14	19	1	1	21	1	0		1	1	4	0	0	0	0	0	0	0	1	0					1	0	1	0	0	0	0	0	1	0	1	0	1	0	0	0	0	1
290	2	0		21	0	0	2	21	26	1	3	26	1	0		1	1	3	1	0	0	0	1	0	0	0	0					0	0	1	0	0	0	0	0	1	0	1	0	1	0	0	0	1	1
291	2	0		37	0	0	3	21	26	1	2	29	2	0		1	1	4	0	0	0	0	1	0	0	1	1	0	0	0	1	1	0	1	1	0	0	0	1	1	0	0	0	0	0	0	0	1	1
292	2	0		34	0	0	3	21	40	1	1	51	2	1	0	1	1	4	0	0	0	0	1	0	0	0	0					1	0	1	0	0	0	0	0	1	0	0	0	0	0	0	0	1	0
293	2	0		23	0	0	2	21	19	1	1	23	1	1	0	1	1	2	1	0	1	0	0	0	0	0	0					0	0	1	0	0	0	0	0	1	0	1	0	1	0	0	0	1	1
294	2	0		24	0	0	2	21	27	1	3	27	3	1	0	0	1	3	0	0	0	0	1	0	0	1	0					1	0	1	0	0	0	0	0	0	0	1	0	1	0	0	0	1	0
295	2	0		29	0	0	3	21	19	1	2	25	1	0		1	1	2	1	0	0	0	0	0	0	0	0					1	0	1	1	0	0	0	1	1	0	1	0	1	0	0	0	1	1
296	2	0		32	0	0	3	21	23	1	2	30	1	1	0	0	1	3	1	0	0	0	0	0	0	0	1	0	0	0	1	1	0	1	1	0	0	0	1	1	0	1	0	1	0	0	0	1	1
297	2	0		28	0	0	2	21	20	1	2	25	1	0		0	1	4	0	0	0	0	0	1	0	0	0					0	0	1	0	0	0	0	0	1	0	1	0	0	0	0	0	1	1
298	2	0		28	0	0	2	21	35	1	2	38	1	0		1	1	3	0	0	0	0	1	0	0	0	0					1	0	1	0	0	0	0	0	1	0	1	0	1	0	0	0	1	0
299	2	0		32	0	0	3	21	17	1	1			0		1	1	4	0	0	0	0	0	1	0	0	1	0	0	0	1	0	0	1	1	0	0	0	1	1	0	1	0	0	0	0	0	1	0
300	2	0		12	0	0	1	21	37	1	0		1	0		1	1	4	0	0	0	0	0	1	0	0	1	0	0	0	1	1	0	1	0	0	0	0	0	0	0	1	0	0	0	0	0	1	1
301	2	0		33	0	0	3	21	29	1	1	57	2	1	0	1	1	2	1	0	0	0	1	0	0	0	1	0	0	0	1	1	0	1	0	0	0	0	0	1	0	1	0	1	0	1	0	1	0
302	2	0		28	0	0	2	21	20	3	3	26	3	99		0	0	4	1	0	0	0	0	0	0	0	1	0	0	0	1	0	0	1	0	0	0	0	0	1	0	1	1	1	0	0	0	0	0
303	2	0		19	0	0	1	21	18	1	2	20	1	1	0	1	1	4	0	0	0	0	0	1	0	0	1	0	0	0	1	1	0	0	1	0	0	0	1	1	0	1	0	0	0	0	0	0	0
304	2	0		32	0	0	3	21	26	1	1	32	1	1	0	1	1	2	1	0	0	0	1	0	0	1	1	0	0	0	1	0	0	1	1	0	0	0	1	1	0	1	0	1	0	0	0	1	1
305	2	0		29	0	0	3	21	30	1	2	34	2	0		1	1	3	1	0	0	0	0	0	0	0	0					1	0	1	0	0	0	0	0	1	0	1	0	0	0	0	0	1	1
306	2	0		28	0	0	2	21	19	1	2	22	1	0		1	1	4	0	0	0	0	1	0	0	0	0					1	0	1	0	0	0	0	0	1	0	1	0	0	0	1	0	1	0
307	2	0		36	0	0	3	21	31	1	3	36	2	99		1	1	3	0	0	0	0	1	0	1	1	1	0	0	0	1	1	0	1	1	0	0	0	1	1	0	1	0	1	0	0	0	1	0
308	2	0		30	0	0	3	21	24	1	3	27	1	0		1	1	1	1	0	0	0	1	0	0	0	0					1	0	1	1	0	0	0	1	1	0	1	0	1	0	0	0	1	1
309	2	0		24	0	0	2	21	23	1	2	28	1	99		1	1	3	0	0	0	0	1	0	0	1	0					1	0	1	0	0	0	0	0	1	0	1	0	1	0	0	0	1	1
310	2	0		24	0	0	2	21	17	1	2	31	1	99		1	1	3	0	0	0	0	0	0	0	0	0					1	0	1	0	0	0	0	0	1	0	1	0	1	0	0	0	0	1
311	2	0		36	0	0	3	21	30	1	2	34	1	1	0	1	1	3	1	0	0	0	1	0	0	0	1	0	0	0	1	1	0	1	1	0	0	0	1	1	0	1	0	1	0	0	0	1	1
312	2	0		26	0	0	2	21	21	1	3	24	2	0		1	1	3	0	0	1	0	1	0	0	0	1	0	1	0	0	1	0	1	0	0	0	0	0	1	0	1	0	1	0	0	0	1	1
313	2	0		23	0	0	2	21	19	1	3	23	2	0		1	1	2	0	0	0	0	1	0	0	0	0					1	0	1	0	0	0	0	0	1	0	1	0	1	0	0	0	1	1
314	2	0		35	0	0	3	21	19	1	3	25	3	0		1	1	3	1	0	0	0	1	0	1	0	0					1	0	1	0	0	0	0	0	1	0	0	0	1	0	0	0	1	1
315	2	0		36	0	0	3	21	19	1	2	20	1	0		1	1	3	1	0	0	0	0	0	0	0	0					1	0	1	0	0	0	0	0	1	0	0	0	1	0	0	0	1	1
316	2	0		36	0	0	3	21	22	1	3	23	2	99		1	1	4	0	0	0	0	1	0	0	1	0					1	0	1	0	0	0	0	0	1	0	0	0	1	0	0	0	1	0
317	2	1	0	32	0	1	3	21	24	1	1	28		0		0	0	3	1	0	0	0	0	0	0	1	1	0	0	0	1	1	0	1	0	0	0	0	0	1	0	1	0	1	0	0	0	1	0
318	2	0		32	0	0	3	21	21	3	1		3	99		0	0	2	1	0	0	0	0	0	0	1	1	0	0	0	1	1	0	1	1	0	0	0	1	1	1	1	1	1	0	0	0	0	1
319	2	0		26	0	0	2	21	34	1	2	37	1	0		1	1	4	0	0	0	0	1	0	0	1	0					1	0	1	0	0	0	0	0	1	0	1	0	0	0	0	0	1	1
320	2	0		28	0	0	2	21	31	1	2	32	1	99		0	1	4	0	0	0	0	1	0	0	0	0					1	0	1	0	0	0	0	0	1	0	0	0	1	0	0	0	1	1
321	2	0		27	0	0	2	21	21	1	2	23	1	0		0	1	4	1	0	0	0	0	0	0	0	0					1	0	0	0	0	0	0	0	1	0	1	0	0	0	0	0	1	1
322	2	0		39	0	0	3	21	19	1	2	21	2	1	0	1	1	3	0	0	0	0	1	0	0	1	1	0	0	0	1	1	0	1	1	0	0	0	1	1	0	0	0	0	0	0	0	1	0
323	2	0		29	0	0	3	21	30	1	1	34	0	0		1	1	2	0	0	0	0	0	1	0	0	1	0	0	0	1	1	0	1	1	0	0	0	1	1	0	1	0	1	0	0	0	1	1
324	2	0		33	0	0	3	21	24	1	1	35	1	0		0	1	3	0	0	0	0	0	1	0	0	0					1	0	1	0	0	0	0	0	1	0	0	0	1	0	0	0	1	1
325	2	0		20	0	0	1	21	21	1	1	23	1	1	0	1	1	3	0	0	0	0	1	0	0	0	0					1	0	1	1	0	0	0	1	0	0	0	0	1	0	1	0	1	1
326	2	0		23	0	0	2	21	23	1	1	32	1	1	0	1	1	4	0	0	0	0	1	0	0	0	0					0	0	1	1	0	0	0	1	0	0	1	0	1	0	0	0	1	0
327	2	0		32	0	0	3	21	30	1	3	32	3	99		1	1	4	1	0	0	0	0	0	0	0	1	0	0	0	1	1	0	1	1	0	0	0	1	1	1	1	1	1	0	0	0	0	1
328	2	0		24	0	0	2	21	32	1	2	36	1	0		1	1	3	0	0	0	0	1	0	0	0	1	0	0	0	1	0	0	1	1	0	0	0	1	1	0	1	1	1	0	0	0	1	1
329	2	0		23	0	0	2	21	28	1	1	44	1	0		1	1	2	1	0	0	0	0	0	0	0	0					1	0	1	0	0	0	0	0	1	0	1	0	1	0	0	0	1	1
330	2	0		26	0	0	2	21	18	1	2		1	0		1	1	4	1	0	0	0	1	0	0	1	0					1	0	1	0	0	0	0	0	1	0	0	0	1	0	0	0	0	1
331	2	0		20	0	0	1	21	19	1	2	22		0		1	1	4	0	0	0	0	0	0	0	1	0					0	0	0	0	0	0	0	0	1	0	1	0	1	0	0	0	1	1
332	2	0		30	0	0	3	21	19	1	2	18	2	1	0	1	1	3	1	0	0	0	1	0	0	1	0					1	0	1	0	0	0	0	0	1	0	1	0	1	0	0	0	1	0
333	2	0		16	0	0	1	21	15	1	2	22		0		1	1	3	1	0	0	0	1	0	0	1	0					1	0	1	0	0	0	0	0	1	0	1	0	1	0	1	0	1	0
334	2	0		24	0	0	2	21	21	1	3	22		99		1	1	3	1	0	0	0	0	0	0	1	0					1	0	1	1	0	1	0	1	0	0	0	0	1	0	0	0	1	0
335	2							21	18	1	2			99		1	1	4	0	0	0	0	1	0	0	0	0					0	1
336	2	0		24	0	0	2	21	25	1	3	28	1	99		1	1	4	0	0	0	0	1	0	0	0	1	0	0	0	1	1	0	1	1	0	0	0	1	1	0	0	0	0	0	0	0	1	1
337	2	0		21	0	0	2	21	34	1	2	37	1	0		1	1	4	0	0	0	0	1	0	0	1	0					1	0	1	1	0	0	0	1	1	0	0	0	1	0	0	0	1	1
338	2	0		24	0	0	2	21	34	5	2	39	2	99		1	1	2	1	0	0	0	0	0	0	1	1	0	0	0	1	0	0	1	1	0	0	0	1	1	0	1	0	1	0	0	0	0	1
339	2	1	0	32	0	1	3	21	28	4	1	28	1	99		1	1	3	1	0	0	0	0	0	0	1	1	0	0	0	1	1	0	0	0	0	0	0	0	1	0	1	1	1	0	0	0	0	1
340	2	0		13	0	0	1	21	21	1	1	23	1	1	0	1	1	4	0	0	0	0	1	0	0	1	1	0	0	0	1	0	0	1	0	0	0	0	0	1	0	1	0	1	0	0	0	1	1
341	2	0		23	0	0	2	21	23	1	2	33	1	99		1	1	2	1	0	0	0	1	0	0	1	0					1	0	1	0	0	0	0	0	0	0	1	0	1	0	1	0	0	0
342	2	0		27	0	0	2	21	24	1	1	29	0	0		1	1	3	0	0	0	0	1	0	0	0	1	0	0	0	1	1	0	1	0	0	0	0	0	1	0	1	0	1	0	0	0	1	0
343	2	0		28	0	0	2	21	22	1	2	28	2	1	0	1	1	3	0	0	0	0	1	0	0	0	1	0	0	0	1	1	0	1	0	0	0	0	0	1	0	1	0	1	0	0	0	1	1
344	2	0		34	0	0	3	21	21	3	3	26	3	99		1	1	4	0	0	0	0	0	1	0	0	0					0	0	0	0	0	0	0	0	1	0	1	1	1	0	0	0	0	1
345	2	0		22	0	0	2	21	20	3	3	22	1	1	0	1	1	2	1	0	0	0	0	0	0	1	0					0	0	1	0	0	0	0	0	1	0	1	0	1	0	0	0	1	1
346	2	0		10	0	0	1	21	26	1	1	39		0		1	1	4	0	0	0	0	1	0	0	0	1	0	0	0	1	0	0	1	0	0	0	0	0	1	0	1	0	1	0	0	0	1	1
347	2	0		20	0	0	1	21	18	1	1	20	1	0		1	1	4	0	0	0	0	1	1	0	0	0					1	0	1	0	0	0	0	0	1	0	0	0	0	0	0	0	1	1
348	2	0		27	0	0	2	21	24	1	0	28	1	99		1	1	3	0	0	0	0	1	1	0	0	1	0	0	0	1	1	0	1	0	0	0	0	0	1	0	0	0	0	0	0	0	1	1
349	2	0		19	0	0	1	21	22	1	1	30	0	1	0	1	1	4	0	0	0	0	1	0	0	0	0					0	0	1	1	0	0	0	1	1	0	1	0	1	0	0	0	1	1
350	2	0		38	0	0	3	21	31	1	3	34	1	1	0	1	1	4	1	0	1	0	1	0	0	0	0					1	0	0	0	0	0	0	0	1	0	0	0	1	0	1	0	1	0
351	2	0		23	0	0	2	21	20	3	3	22	3	0		1	1	4	0	0	0	0	1	0	0	1	1	0	0	0	1	1	0	1	1	0	0	0	1	0	0	0	0	0	0	0	0	1	1
352	2							21	18	1	2	26	1	99		1	1	4	0	0	0	0	1	0	0	0	0					1	1
353	2	0		21	0	0	2	21	19	3	2		1	0		1	1	4	0	0	0	0	1	0	0	1	0					0	0	1	0	0	0	0	0	1	0	0	0	0	0	0	0	1	1
354	2	0		31	0	0	3	21	16	1	2	23	1	1	0	1	1	4	0	0	0	0	1	0	0	1	1	0	0	0	1	1	0	0	0	0	0	0	0	1	0	1	0	0	0	0	0	1	1
355	2	0		18	0	0	1	21	20	1	2		3	99		1	1	1	1	0	0	0	1	0	0	0	0					1	0	1	1	0	0	0	1	1	0	1	0	1	0	0	0	1	0
356	2	0		13	0	0	1	21	37	1	1	44	0	1	0	1	1	4	0	0	0	0	1	0	0	1	1	0	0	0	1	0	0	1	0	0	0	0	0	1	0	1	0	1	0	0	0	1	0
357	2	0		23	0	0	2	21	20	1	1	24		0		1	1	3	0	0	0	0	1	0	0	0	1	0	0	0	1	1	0	1	0	0	0	0	0	1	0	0	0	0	0	0	0	1	1
358	2	0		19	0	0	1	21	20	1	2	23	3	1		1	1	1	1	0	0	0	0	0	0	1	1	0	0	0	1	1	0	0	0	0	0	0	0	1	0	1	0	1	0	0	0	0	0
359	2	0		22	0	0	2	21	21	1	1	26	1	1	0	1	1	4	1	0	0	0	1	0	0	0	0					1	0	1	1	0	0	0	1	1	0	1	0	1	0	0	0	1	0
360	2	0		28	0	0	2	21	16	1	2	23	3	99		1	1	2	0	0	0	0	0	0	0	1	0					1	0	1	0	0	0	0	0	1	0	1	1	1	0	0	0	1	1
361	2	0		19	0	0	1	21	19	1	2	21		1	0	1	1	4	0	0	1	0	0	0	0	0	0					0	0	1	1	0	0	0	1	1	0	0	0	0	0	1	0	1	0
362	2	0		28	0	0	2	21	30	1	3	33	1	1	0	1	1	4	1	0	1	0	1	0	0	1	1	0	0	0	1	1	0	1	0	0	0	0	0	1	0	1	0	1	0	0	0	1	1
363	2	0		27	0	0	2	21	19	1	1	32	1	99		1	1	4	0	0	0	0	1	1	0	0	0					0	0	1	0	0	0	0	0	1	0	0	0	0	0	0	0	1	1
364	2	0		22	0	0	2	21	20	1	1	31	0	0		1	1	3	1	0	0	0	0	0	0	1	0					1	0	1	0	0	0	0	0	1	0	1	0	1	0	0	0	1	1
365	2	0		28	0	0	2	21	25	1	2	28	1	1	0	1	1	3	1	0	0	0	1	0	0	0	1	0	0	0	1	0	0	1	1	0	0	0	1	1	0	1	0	1	0	0	0	1	0
366	2	0		23	0	0	2	21	24	4	1			99		1	1	4	1	0	0	0	0	0	0	1	1	0	0	0	1	0	0	1	1	0	0	0	1	1	0	1	1	1	0	0	0	1	0
367	2	0		26	0	0	2	21	21	1	1	25	1	0		1	1	3	0	0	0	0	1	0	0	1	0					0	0	1	0	0	0	0	0	1	0	0	0	0	0	0	0	1	0
368	2	0		32	0	0	3	21	36	1	2	41	1	0		1	1	3	0	0	0	0	1	0	0	0	0					1	0	1	0	0	0	0	0	1	0	1	0	1	0	0	0	1	0
369	2	0		32	0	0	3	21	20	1	2	23	0	1	0	1	1	3	0	0	0	0	1	0	0	1	1	0	0	0	1	1	0	1	1	0	0	0	1	1	0	1	0	1	0	0	0	1	1
370	2	0		22	0	0	2	21	17	1	2	22	2	1	0	1	1	3	0	0	0	0	1	0	0	0	0					1	0	1	0	0	0	0	0	0	0	1	0	1	0	0	0	1	0
371	2	0		38	0	0	3	21	17	1	1	26	2	0		1	1	4	0	0	0	0	1	1	0	0	0					0	0	1	0	0	0	0	0	1	1	1	1	1	0	0	0	1	1
372	2	0		32	0	0	3	22	26	1	3	29	3	99		1	1	2	1	0	0	0	0	0	0	1	1	0	0	0	1	1	0	1	1	0	0	0	1	1	1	1	1	1	0	0	0	0	1
373	2	0		24	0	0	2	22	25	1	2	29	2	99		1	1	3	1	0	0	0	0	0	0	1	0					1	0	1	0	0	0	0	0	1	0	1	0	1	0	0	0	0	1
374	2	0		11	0	0	1	22	23	1	3	28	3	0		1	1	4	1	0	0	0	0	0	1	1	0					1	0	1	0	0	0	0	0	1	0	1	0	1	0	0	0	0	0
375	2	0		19	0	0	1	22	31	1	1	45	3	0		1	2	4	1	0	0	0	0	0	0	0	1	0	0	0	1	1	0	1	0	0	0	0	0	1	0	1	0	1	0	0	0	0	0
376	2	0		26	0	0	2	22	37	1	2	40	1	1	1	1	1	1	1	0	0	0	0	0	0	1	0					1	0	1	0	0	0	0	0	1	0	1	0	1	0	0	0	0	0
377	2	0		25	0	0	2	22	23	1	2	26	2	0		1	1	4	1	0	0	0	1	0	0	0	1	0	0	0	1	1	0	1	0	0	0	0	0	1	0	1	1	1	0	0	0	0	1
378	2	0		23	0	0	2	22	34	1	3	54	1	1	0	1	1	4	1	0	0	0	0	0	1	1	0					1	0	1	0	0	0	0	0	1	0	1	0	1	0	0	0	0	1
379	2	0		17	0	0	1	22	23	1	3	26	1	1	0	1	1	2	1	0	0	0	0	0	0	1	0					0	0	1	0	0	0	0	0	1	1	1	1	1	1	0	0	1	0
380	2	0		32	0	0	3	22	23	3	3	27	3	0		1	1	3	1	0	0	0	0	0	0	1	0					1	0	1	0	0	0	0	0	1	0	1	0	1	0	0	0	0	1
381	2	0		36	0	0	3	22	21	1	2	25	2	1	0	1	1	2	1	0	0	0	0	0	0	1	1	0	0	0	1	1	0	1	0	0	0	0	0	1	0	1	0	1	0	0	0	1	0
382	2	0		23	0	0	2	22	29	1	3	33	3	0		1	1	2	1	0	0	0	0	0	0	1	0					1	0	1	0	0	0	0	0	1	0	1	0	1	0	0	0	1	0
383	2	0		28	0	0	2	22	31	1	2	33	2	1	0	1	1	4	1	0	0	0	0	0	0	0	0					1	0	1	0	0	0	0	0	1	0	1	0	1	0	0	0	1	0
384	2	0		36	0	0	3	22	28	1	2	38	3	1	0	1	1	1	1	0	0	0	0	0	0	0	1	0	0	0	1	1	0	1	0	0	0	0	0	1	0	1	0	1	0	0	0	1	0
385	2	0		36	0	0	3	22	29	1	2	34	1	1	0	1	1	4	1	0	0	0	1	0	0	1	1	0	0	0	1	1	0	1	0	0	0	0	0	1	0	0	0	1	0	0	0	1	0
386	2	0		36	0	0	3	22	25	1	3	34	1	0		1	1	4	1	0	0	0	0	0	0	0	1	0	0	0	1	1	0	0	0	0	0	0	0	1	0	1	0	1	0	0	0	0	0
387	2	0		13	0	0	1	22	27	1	3	32	3	1	0	1	1	3	1	0	0	0	1	0	0	1	0					1	0	1	0	0	0	0	0	1	0	0	0	0	0	0	0	0	1
388	2	0		28	0	0	2	22	21	1	3	30	3	1	0	1	1	4	1	0	0	0	0	0	0	1	1	0	0	0	1	1	0	1	0	0	0	0	0	1	0	1	0	1	0	0	0	1	0
389	2	0		32	0	0	3	22	21	1	1	25	1	0		1	1	4	1	0	0	0	0	0	0	0	0					1	0	1	0	0	0	0	0	1	0	1	0	1	0	0	0	1	0
390	2	1	0	28	0	1	2	22	25	1	2	31	1	0		1	1	4	1	0	0	0	0	0	0	1	1	0	0	0	1	1	0	0	0	0	0	0	0	1	0	1	0	1	0	0	0	0	0
391	2	0		32	0	0	3	22	41	1	2	43	1	1	0	1	1	3	1	0	0	0	0	0	0	0	0					1	0	1	0	0	0	0	0	1	0	1	0	1	0	0	0	0	1
392	2	0		29	0	0	3	22	28	1	3	33	3	1	0	1	1	4	1	0	0	0	0	0	0	1	1	0	0	0	1	1	0	1	1	0	0	0	1	1	1	1	1	1	1	0	0	1	0
393	2	0		32	0	0	3	22	28	1	1	34	1	0		1	1	4	1	0	0	0	0	0	0	0	0					1	0	1	0	0	0	0	0	1	1	1	1	1	1	0	0	0	1
394	2	0		32	0	0	3	22	29	1	2	31	3	0		1	1	4	1	0	0	0	0	0	0	0	1	0	0	0	1	1	0	1	0	0	0	0	0	1	0	1	0	1	0	0	0	0	1
395	2	0		32	0	0	3	22	28	1	2	29	3	1	0	1	1	2	1	0	0	0	0	0	0	1	1	0	0	0	1	1	0	1	0	0	0	0	0	1	0	1	0	1	0	0	0	0	0
396	2	0		32	0	0	3	22	24	1	2	37	2	1	0	1	1	2	1	0	0	0	0	0	0	0	1	0	0	0	1	1	0	1	1	0	0	0	1	1	0	1	0	1	0	0	0	0	0
397	2	0		32	0	0	3	22	23	1	2	30	3	0		1	1	4	1	0	0	0	0	0	0	1	0					1	0	1	0	0	0	0	0	1	0	1	0	1	0	0	0	1	0
398	2	0		32	0	0	3	22	29	1	2	36	1	0		1	1	4	1	0	0	0	0	0	0	0	0					1	0	1	0	0	0	0	0	1	0	1	0	1	0	0	0	0	0
399	2	0		32	0	0	3	22	29	1	1	34	2	0		1	1	4	1	0	0	0	0	0	0	0	0					1	0	1	0	0	0	0	0	1	1	1	1	1	1	0	0	0	0
400	2	0		28	0	0	2	22	24	3	2	27	2	0		0	0	4	1	0	0	0	0	0	0	0	1	0	0	0	1	1	0	1	0	0	0	0	0	1	1	1	1	1	1	0	0	0	0
401	2	0		32	0	0	3	22	22	1	1		1	0		0	0	3	1	0	0	0	0	0	0	0	0					1	0	1	0	0	0	0	0	1	0	1	0	1	0	0	0	0	0
402	2	0		32	0	0	3	22	37	1	3	40	3	1	0	1	1	4	1	0	0	0	0	0	0	1	0					1	0	1	0	0	0	0	0	1	0	1	0	1	0	0	0	1	0
403	2	0		32	0	0	3	22	30	1	1			0		0	0	4	1	0	0	0	0	0	0	0	1	0	0	0	1	1	0	1	0	0	0	0	0	1	0	1	0	1	0	0	0	1	1
404	2	1	0	36	0	1	3	22	22	1	3	30	1	0		1	1	4	1	0	0	0	0	0	1	0	0					1	0	0	0	0	0	0	0	1	0	1	0	1	0	0	0	0	0
405	2	0		36	0	0	3	22	35	1	1	40	2	0		1	1	3	1	0	0	0	0	0	0	1	0					1	0	1	0	0	0	0	0	1	0	1	0	1	0	0	0	1	0
406	2							22	29	1	1	34	2	99		1	1	4	1	0	0	0	0	0	0	0	0					0	1
407	2	0		28	0	0	2	22	33	1	3	37	2	0		1	1	3	1	0	0	0	0	0	0	1	1	0	0	0	1	1	0	0	0	0	0	0	0	1	0	0	0	1	0	0	0	0	0
408	2	0		16	0	0	1	22	26	1	2	28	3	1	0	0	0	4	0	0	0	0	1	0	0	0	1	0	0	0	1	1	0	1	0	0	0	0	0	1	0	1	0	1	0	0	0	0	1
409	2	0		25	0	0	2	22	25	1	3	25	3	1	0	1	1	3	0	0	0	0	0	1	0	0	1	0	0	0	1	1	0	1	0	0	0	0	0	1	0	1	0	1	0	0	0	1	1
410	2							22	29	1	2	30		0		1	1	4	1	0	0	0	0	0	0	0	1	0	0	0	1	0	1
411	2	0		18	0	0	1	22	22	1	3	26	1	1	0	1	1	2	1	0	0	0	0	0	0	1	1	0	0	0	1	1	0	1	1	0	0	1	0	1	0	1	1	1	0	0	0	0	0
412	2	0		28	0	0	2	22	28	1	2		3	1	0	1	1	3	1	0	0	0	0	0	0	0	0					1	0	1	0	0	0	0	0	1	0	1	0	1	0	0	0	0	0
413	2	0		28	0	0	2	22	27	1	2	29	2	1	0	1	1	3	1	0	0	0	0	0	0	1	0					1	0	1	0	0	0	0	0	1	0	1	0	1	0	0	0	1	0
414	2	0		36	0	0	3	22	35	1	1	38	1	0		1	1	4	1	0	0	0	0	0	0	0	0					1	0	1	0	0	0	0	0	1	0	1	0	1	0	0	0	0	1
415	2	0		32	0	0	3	22	24	1	2	25	2	0		0	0	3	1	0	0	0	0	0	0	0	1	0	0	0	1	1	0	1	0	0	0	0	0	1	1	0	1	1	1	0	0	1	0
416	2	0		32	0	0	3	22	21	1	3	23	3	1	0	1	1	3	1	0	0	0	0	0	1	0	1	0	0	0	1	0	0	1	0	0	0	0	0	1	0	1	0	1	0	0	0	0	0
417	2	0		23	0	0	2	22	36	1	3	40	3	1	0	1	1	1	1	0	0	0	0	0	0	1	1	0	0	0	1	1	0	1	0	0	0	0	0	1	0	1	0	1	0	0	0	0	1
418	2							22	28	1	2	42	0	1	1	1	1	4	1	0	0	0	0	0	0	0	0					0	1	0	0	0	0	0	0	1	0	0	0	1	0	0	0	0	0
419	2	0		28	0	0	2	22	25	1	3	33	2	1	0	1	1	2	1	0	0	0	0	0	0	0	0					1	0	1	0	0	0	0	0	1	0	1	0	1	0	0	0	0	0
420	2	0		28	0	0	2	22	23	1	2	28	1	0		1	1	3	1	0	0	0	0	0	0	0	0					1	0	1	0	0	0	0	0	1	0	1	0	1	0	0	0	0	1
421	2	0		36	0	0	3	22	25	1	2			0		1	1	4	1	0	0	0	0	0	0	1	1	0	0	0	1	1	0	1	0	0	0	0	0	1	0	1	0	1	0	0	0	0	1
422	2	0		26	0	0	2	22	25	1	2	27	3	99		1	1	1	1	0	0	0	0	0	0	1	1	0	0	0	1	0	0	1	0	0	0	0	0	1	0	1	0	1	0	0	0	1	0
423	2	0		28	0	0	2	22	24	1	2	32	1	1	0	1	1	2	1	0	0	0	0	0	0	0	0					1	0	1	0	0	0	0	0	1	0	1	0	1	0	0	0	1	0
424	2							22	28	1	3	37	3	99		1	1	3	1	0	0	0	0	0	0	1	1	0	0	0	1	1	1
425	2	1	0	37	0	1	3	22	21	1	1	24	1	0		1	1	1	1	0	0	0	0	0	0	0	0					1	0	1	1	0	0	0	1	1	0	1	0	1	0	0	0	0	1
426	2	0		32	0	0	3	22	31	1	3	35	3	1	0	1	1	4	1	0	0	0	0	0	1	0	0					1	0	1	0	0	0	0	0	1	0	1	0	1	0	0	0	0	1
427	2	0		32	0	0	3	22	39	1	2	50		1	0	1	1	1	1	0	0	0	0	0	0	1	1	0	0	0	1	0	0	1	0	0	0	0	0	1	0	1	0	1	0	0	0	0	1
428	2	0		17	0	0	1	22	27	1	3	33	2	0		1	1	3	1	0	0	0	0	0	0	1	0					1	0	1	0	0	0	0	0	1	1	1	1	1	1	0	0	1	1
429	2	0		17	0	0	1	22	21	1	3	27	1	99		1	1	3	1	0	0	0	1	0	0	1	1	0	0	0	1	1	0	1	0	0	0	0	0	1	0	1	0	1	0	0	0	0	0
430	2	0		32	0	0	3	22	24	1	3	27	3	1	0	1	1	4	1	0	0	0	0	0	1	1	1	0	0	0	1	1	0	1	0	0	0	0	0	1	0	1	0	1	0	0	0	0	0
431	2	0		27	0	0	2	22	27	1	3	32	2	1	0	1	1	1	1	0	0	0	0	0	0	1	0					1	0	1	0	0	0	0	0	1	0	1	1	1	1	0	0	0	0
432	2	0		32	0	0	3	22	23	1	3	25	2	1	0	1	1	1	1	0	0	0	0	0	0	0	1	0	0	0	1	1	0	1	0	0	0	0	0	1	0	1	0	1	0	0	0	0	1
433	2	0		28	0	0	2	22	35	1	3	39	3	1	0	1	1	4	1	0	0	0	0	0	0	0	0					1	0	1	0	0	0	0	0	1	0	1	0	1	0	0	0	1	0
434	2	0		28	0	0	2	22	32	1	2	36	1	0		1	1	4	1	0	0	0	0	0	0	1	0					1	0	1	0	0	0	0	0	1	0	1	0	1	0	0	0	0	0
435	2	0		34	0	0	3	22	24	1	3	31	2	1	0	1	1	4	1	0	0	0	0	0	0	0	1	0	0	0	1	0	0	1	0	0	0	0	0	1	0	1	0	1	0	0	0	0	0
436	2	0		31	0	0	3	22	23	1	2	28	1	0		1	1	2	1	0	0	0	0	0	0	1	0					1	0	1	0	0	0	0	0	1	0	1	0	1	0	0	0	1	1
437	2	0		32	0	0	3	22	29	1	1	48	1	1	0	1	1	2	1	0	0	0	0	0	0	0	1	0	0	0	1	1	0	1	0	0	0	0	0	1	0	1	1	1	0	0	0	0	0
438	2	0		21	0	0	2	22	37	1	2		2	1	0	1	1	4	1	0	0	0	0	0	0	0	0					1	0	1	1	0	0	0	1	1	0	1	0	1	0	0	0	0	0
439	2	0		27	0	0	2	22	23	1	1		1	1	0	0	0	2	1	0	0	0	0	0	0	0	1	0	0	0	1	1	0	1	0	0	0	0	0	1	0	1	0	1	0	0	0	0	1
440	2	0		17	0	0	1	22	27	1	2		3	0		1	1	4	1	0	0	0	0	0	0	1	1	0	0	0	1	1	0	1	0	0	0	0	0	1	1	1	1	1	1	0	0	1	0
441	2	0		20	0	0	1	22	23	1	2	26	3	99		1	1	3	1	0	0	0	0	0	0	0	0					1	0	1	0	0	0	0	0	1	0	1	0	1	0	0	0	1	1
442	2	0		28	0	0	2	22	23	3	2	27	3	0		1	1	2	1	0	0	0	0	0	0	0	1	0	0	0	1	0	0	1	0	0	0	0	0	1	0	1	0	1	0	0	0	0	1
443	2							22	26	1	2	30	1	0		1	1	4	1	0	0	0	0	0	0	1	1	0	0	0	1	0	1
444	2	0		29	0	0	3	22	21	3	3	25	3	1	0	1	1	3	1	0	0	0	0	0	1	0	1	0	0	0	1	1	0	1	0	0	0	0	0	1	0	1	0	1	0	0	0	0	1
445	2	0		36	0	0	3	22	23	3	3	29	3	99		1	1	3	1	0	0	0	0	0	1	0	0					0	0	0	0	0	0	0	0	1	0	1	0	1	0	0	0	0	1
446	2	0		11	0	0	1	22	34	1	1	37	1	0		1	1	4	1	0	0	0	0	0	0	0	0					1	0	1	1	0	0	0	1	1	0	1	0	1	0	0	0	1	0
447	2	0		25	0	0	2	22	26	1	2	33	2	0		1	1	4	1	0	0	0	0	0	0	0	0					1	0	1	0	0	0	0	0	1	0	1	0	1	0	0	0	1	1
448	2	0		24	0	0	2	22	23	1	3	29	2	1	0	1	1	4	1	0	0	0	0	0	0	0	0					1	0	1	0	0	0	0	0	1	0	1	0	1	0	0	0	0	1
449	2	0		9	0	0	1	22	24	1	3		1	0		1	1	4	1	0	0	0	0	0	1	0	0					1	0	1	0	0	0	0	0	1	0	0	0	1	0	0	0	0	1
450	2	1	1	32	1	0	3	22	25	1	0		1	1	1	1	1	1	1	0	0	0	0	0	0	1	1	0	0	0	1	1	0	0	0	0	0	0	0	1	0	0	0	1	0	0	0	0	0
451	2	0		28	0	0	2	22	26	1	2	32	1	0		1	1	3	1	0	0	0	0	0	0	0	1	0	0	0	1	1	0	1	0	0	0	0	0	1	0	1	0	1	0	0	0	0	0
452	2	0		7	0	0	1	22	22	1	1	25	2	0		1	1	3	1	0	0	0	0	0	0	0	1	0	0	0	1	1	0	1	0	0	0	0	0	1	0	1	0	1	0	0	0	1	0
453	2	0		8	0	0	1	22	21	1	1	36	2	0		1	1	4	1	0	0	0	0	0	0	0	0					1	0	1	1	0	0	0	1	1	0	1	0	1	0	0	0	0	1
454	2	0		32	0	0	3	22	23	1	3	25	3	0		1	1	3	1	0	0	0	0	0	0	0	0					1	0	1	0	0	0	0	0	1	0	1	0	1	0	0	0	0	1
455	2	0		28	0	0	2	22	38	1	2	55	1	0		1	1	3	1	0	0	0	0	0	0	0	0					1	0	1	1	0	0	0	1	1	0	1	0	1	0	0	0	0	1
456	2	0		11	0	0	1	22	21	1	3	23	1	1	0	1	1	3	0	0	0	0	1	0	0	0	0					1	0	1	0	0	0	0	0	1	0	1	0	1	0	0	0	0	0
457	2	0		26	0	0	2	22	26	1	1	29	1	1	0	1	1	2	1	0	0	0	1	0	0	0	0					1	0	1	0	0	0	0	0	1	0	1	0	1	0	0	0	0	1
458	2	0		28	0	0	2	22	21	3	1		2	0		1	1	3	1	0	0	0	0	0	0	0	0					0	0	1	0	0	0	0	0	1	0	1	0	1	0	0	0	0	1
459	2	0		36	0	0	3	22	23	1	1	25	1	0		1	1	4	1	0	0	0	0	0	0	0	1	0	0	0	1	0	0	1	0	0	0	0	0	1	0	1	0	1	0	0	0	0	1
460	2	0		28	0	0	2	22	31	1	3	40	1	99		1	1	3	0	0	0	0	1	0	0	0	0					1	0	1	0	0	0	0	0	1	0	1	0	1	0	0	0	0	1
461	2	0		36	0	0	3	22	24	3	2	24	1	99		0	0	4	0	0	0	0	0	1	0	0	0					1	0	1	0	0	0	0	0	1	0	1	0	1	0	0	0	0	0
462	2	0		36	0	0	3	22	28	1	3	30	3	1	0	1	1	4	0	0	0	0	1	0	0	0	0					1	0	1	0	0	0	0	0	1	0	1	0	1	0	0	0	1	1
463	2	0		16	0	0	1	22	21	1	1	27	1	1	0	1	1	2	1	0	0	0	1	0	0	1	0					1	0	1	0	0	0	0	0	1	0	1	0	1	0	0	0	0	1
464	2	0		17	0	0	1	22	25	1	1	35		0		1	1	4	1	0	0	0	0	0	0	0	0					1	0	1	0	0	0	0	0	1	0	1	0	1	0	0	0	1	1
465	2	0		24	0	0	2	22	23	1	3	27	3	0		1	1	2	1	0	0	0	0	0	0	0	0					1	0	1	0	0	0	0	0	1	1	1	1	1	1	0	0	0	1
466	2	0		32	0	0	3	22	21	1	3	25	3	1	0	1	1	3	1	0	0	0	1	0	0	0	0					1	0	0	0	0	0	0	0	1	0	1	0	1	0	0	0	0	1
467	2	0		32	0	0	3	22	25	1	3	29	3	0		1	1	4	1	0	0	0	0	0	0	0	0					1	0	1	0	0	0	0	0	1	0	1	0	1	0	0	0	0	0
468	2	0		27	0	0	2	22	29	1	3	34	2	1	0	1	1	4	1	0	0	0	0	0	0	0	0					1	0	1	0	0	0	0	0	1	0	1	0	1	0	0	0	0	1
469	2	0		36	0	0	3	22	30	1	1		1	0		1	1	2	1	0	0	0	0	0	0	0	0					1	0	1	0	0	0	0	0	1	0	1	0	1	0	0	0	0	1
470	2	0		34	0	0	3	22	28	1	2			99		1	1	3	0	0	0	0	0	1	0	0	0					1	0	1	0	0	0	0	0	1	0	1	0	1	0	0	0	0	0
471	2	0		24	0	0	2	22	24	1	3	27	2	0		1	1	3	1	0	0	0	0	0	0	0	0					1	0	1	0	0	0	0	0	1	1	1	1	1	1	0	0	0	0
472	2	0		14	0	0	1	22	23	1	3	24	3	1	0	1	1	2	1	0	0	0	0	0	0	0	0					1	0	1	0	0	0	0	0	1	0	1	0	1	0	0	0	0	1
473	2	0		25	0	0	2	22	27	1	1			1	0	1	1	3	1	0	0	0	0	0	0	0	0					1	0	1	0	0	0	0	0	1	0	1	0	1	0	0	0	1	0
474	2	0		11	0	0	1	22	32	1	2	34	1	1	0	1	1	2	1	0	0	0	0	0	0	0	0					1	0	1	0	0	0	0	0	1	0	1	0	1	0	0	0	1	1
475	2	0		32	0	0	3	22	21	3	2	21	2	99		1	1	1	1	0	0	0	0	0	0	0	0					1	0	1	0	0	0	0	0	1	0	1	0	1	0	0	0	0	0
476	2							22	25	1	3	28	3	99		1	1	4	1	0	0	0	0	0	0	0	0					1	1
477	2	0		24	0	0	2	22	22	1	2	27	2	99		1	1	4	0	0	0	0	0	1	0	0	0					1	0	1	0	0	0	0	0	1	0	1	0	1	0	0	0	1	1
478	2	0		23	0	0	2	22	24	1	2	29	2	1	0	1	1	4	0	0	0	0	0	0	0	1	0					1	0	1	0	0	0	0	0	1	0	1	1	1	0	0	0	1	0
479	2	0		28	0	0	2	22	26	1	3	31	2	1	0	1	1	3	1	0	0	0	0	0	0	0	0					1	0	1	0	0	0	0	0	1	0	1	1	1	0	0	0	0	0
480	2	0		28	0	0	2	22	22	1	3	30	1	1	0	1	1	3	1	0	0	0	0	0	0	0	0					1	0	1	0	0	0	0	0	1	0	1	0	1	0	0	0	0	0
481	2	0		28	0	0	2	22	21	1	2	28	2	1	0	1	1	4	0	0	0	0	0	1	0	0	0					1	0	1	0	0	0	0	0	1	0	1	1	1	0	0	0	0	0
482	2	0		6	0	0	1	22	26	1	3	29	3	1	0	1	1	2	1	0	0	0	0	0	0	0	0					1	0	1	0	0	0	0	0	1	0	1	0	1	0	0	0	0	0
483	2	0		28	0	0	2	22	24	1	3	27	3	1	0	1	1	3	1	0	0	0	0	0	0	0	0					1	0	1	0	0	0	0	0	1	0	1	0	1	0	1	0	1	0
484	2	0		28	0	0	2	22	23	1	2	24	2	1	0	1	1	3	1	0	0	0	0	0	0	0	0					1	0	1	0	0	0	0	0	1	0	1	0	1	0	0	0	0	1
485	2	0		20	0	0	1	22	28	1	1	34	2	0		1	1	4	1	0	0	0	0	0	0	0	0					1	0	1	0	0	0	0	0	1	0	1	0	1	0	0	0	0	1
486	2	0		29	0	0	3	22	41	1	2	52	1	1	0	1	1	3	1	0	0	0	0	0	0	0	0					1	0	1	0	0	0	0	0	1	0	1	0	1	0	0	0	0	1
487	2	0		8	0	0	1	22	22	1	2	24	1	1	0	1	1	4	1	0	0	0	0	0	0	0	0					1	0	1	0	0	0	0	0	1	0	0	0	0	0	0	0	0	1
488	2	0		21	0	0	2	22	31	1	3	34	3	1	0	1	1	3	1	0	0	0	0	0	0	0	0					1	0	1	0	0	0	0	0	1	1	1	1	1	1	0	0	1	0
489	2	0		10	0	0	1	22	35	1	1	40	2	0		1	1	3	1	0	0	0	0	0	0	0	0					1	0	1	0	0	0	0	0	1	0	1	0	1	0	0	0	0	1
490	2	0		16	0	0	1	22	26	1	3	31	3	1	0	1	1	3	1	0	0	0	0	0	0	0	0					1	0	1	0	0	0	0	0	1	0	1	1	1	1	0	0	0	0
491	2	0		34	0	0	3	22	22	1	3	35	3	1	0	1	1	2	1	0	0	0	0	0	0	0	0					1	0	1	0	0	0	0	0	1	0	1	0	1	0	0	0	0	1
492	2							22	26	1	3	30	1	1	1	1	1	3	1	0	0	0	0	0	0	0	0					1	1	1	0	0	0	0	0	1	0	1	0	1	0	0	0	0	0
493	2	0		25	0	0	2	22	26	1	1	27	2	1	0	1	1	2	1	0	0	0	0	0	0	0	0					1	0	1	0	0	0	0	0	1	0	1	0	1	0	0	0	1	1
494	2	0		28	0	0	2	22	33	1	3	35	3	0		1	1	4	0	0	0	0	0	0	0	1	0					1	0	1	0	0	0	0	0	1	0	1	1	1	0	0	0	0	1
495	2	0		36	0	0	3	22	21	1	2	28	1	0		1	1	3	1	0	0	0	0	0	0	0	0					1	0	0	0	0	0	0	0	1	0	1	0	1	0	0	0	0	0
496	2	0		20	0	0	1	22	27	1	3	31	3	99		1	1	4	0	0	0	0	1	0	0	0	0					1	0	1	0	0	0	0	0	1	0	1	0	1	0	0	0	0	1
497	2	0		28	0	0	2	22	24	1	3	27	3	1	0	1	1	2	1	0	0	0	0	0	0	0	0					1	0	1	0	0	0	0	0	1	0	1	0	1	0	0	0	0	1
498	2	0		15	0	0	1	22	32	1	3	35	3	1	0	1	1	4	0	0	0	0	0	1	0	0	0					1	0	1	0	0	0	0	0	1	1	1	1	1	1	0	0	1	0
499	2	0		28	0	0	2	22	22	1	2	26	0	0		1	1	4	0	0	0	0	0	1	0	0	0					1	0	1	0	0	0	0	0	1	0	1	0	1	0	0	0	0	0
500	2	0		32	0	0	3	22	24	1	2	30	1	0		1	1	2	1	0	0	0	0	0	0	0	0					1	0	1	0	0	0	0	0	1	1	1	1	1	1	0	0	0	0
501	2	0		28	0	0	2	22	23	1	2	32	2	1	0	1	1	2	1	0	0	0	0	0	0	0	0					1	0	1	0	0	0	0	0	1	0	1	0	1	0	0	0	0	0
502	2	0		32	0	0	3	22	20	1	2	30	1	1	0	1	1	4	0	0	0	0	0	1	0	0	0					1	0	1	0	0	0	0	0	1	0	1	0	1	0	0	0	0	1
503	2	0		31	0	0	3	22	37	3	2	39	2	99		1	1	2	1	0	0	0	0	0	0	0	0					1	0	1	0	0	0	0	0	1	0	1	0	1	0	0	0	0	1
504	2	0		24	0	0	2	22	27	1	2	37	1	1	0	1	1	2	0	0	0	0	1	0	0	1	0					1	0	1	0	0	0	0	0	1	0	1	0	1	0	0	0	0	0
505	2	0		14	0	0	1	22	28	1	2	33	2	1	0	1	1	2	1	0	0	0	0	0	0	0	0					1	0	1	0	0	0	0	0	1	0	1	0	1	0	0	0	0	1
506	2							22	25	1	2	28	3	0		1	1	2	1	0	0	0	0	0	0	0	0					1	1
507																																		0	0	0	0	0	0	1	0	1	0	1	0	0	0	0	0
508	2	0		32	0	0	3	22	23	1	2	31	1	99		1	1	3	1	0	0	0	0	0	0	0	0					1	0	1	1	0	0	0	1	1	0	1	0	1	0	0	0	0	0
509	2	0		23	0	0	2	22	28	1	3	30	3	1	0	1	1	2	1	0	0	0	0	0	0	0	0					1	0	1	0	0	0	0	0	1	0	1	0	1	0	0	0	0	1
510	2	0		18	0	0	1	22	22	1	2	27	3	1	0	1	1	4	1	0	0	0	0	0	0	0	0					1	0	1	0	0	0	0	0	1	0	1	0	1	0	0	0	1	1
511	2	0		32	0	0	3	22	37	1	2		2	1	0	1	1	2	1	0	0	0	0	0	0	0	0					1	0	1	0	0	0	0	0	1	0	1	0	1	0	0	0	0	0
512	2	0		36	0	0	3	22	30	1	3	37	3	1	0	1	1	2	1	0	0	0	0	0	0	0	0					1	0	1	1	0	0	0	0	1	0	1	1	1	0	0	0	1	1
513	2	0		28	0	0	2	22	23	1	2	26	3	99		1	1	2	1	0	0	0	0	0	0	0	0					1	0	1	0	0	0	0	0	1	0	1	0	1	0	0	0	0	0
514	2							22	21	1	2	25	3	1	0	1	1	2	1	0	0	0	0	0	0	0	0					1	1
515	2	0		21	0	0	2	22	29	1	1	32	2	1	0	1	1	2	1	0	0	0	0	0	0	0	0					1	0	1	0	0	0	0	0	1	0	1	0	1	0	0	0	0	0
516	2	0		19	0	0	1	22	41	1	1	42	2	99		1	1	2	1	0	0	0	0	0	0	0	0					1	0	1	0	0	0	0	0	1	0	1	0	1	0	0	0	0	1
517	2							22	25	1	2	29	1	0		1	1	2	1	0	0	0	0	0	0	0	0					1	1
518	2	0		20	0	0	1	22	24	1	2	26	1	99		1	1	2	1	0	0	0	0	0	0	0	0					1	0	0	0	0	0	0	0	1	0	1	0	1	0	0	0	0	0
519	2	0		18	0	0	1	22	33	1	3	35	2	0		1	1	2	1	0	0	0	0	0	0	0	0					1	0	0	0	0	0	0	0	1	0	1	0	1	0	0	0	0	1
520	2	0		24	0	0	2	22	31	1	1	33	2	0		1	1	2	1	0	0	0	0	0	0	0	0					1	0	1	0	0	0	0	0	1	0	1	0	1	0	0	0	0	1
521	2	0		27	0	0	2	22	29	1	2	37	3	1	0	1	1	2	1	0	0	0	0	0	0	0	0					1	0	0	0	0	0	0	0	1	0	1	0	1	0	0	0	0	0
522	2	0		18	0	0	1	22	29	3	3	36	2	0		1	1	2	1	0	0	0	0	0	0	0	0					1	0	1	0	0	0	0	0	1	0	1	0	1	0	0	0	1	0
523	2	0		6	0	0	1	22	22	3	3	23	3	0		1	1	2	1	0	0	0	0	0	0	0	0					1	0	1	0	0	0	0	0	1	0	1	0	1	0	0	0	0	0
524	2	0		28	0	0	2	22	33	1	3	39	3	1	0	1	1	2	1	0	0	0	0	0	0	0	0					1	0	1	0	0	0	0	0	1	0	1	1	1	0	0	0	0	0
525	2	0		28	0	0	2	22	35	1	2	38	3	1	0	1	1	2	1	0	0	0	0	0	0	0	0					1	0	1	0	0	0	0	0	1	0	1	1	1	0	0	0	1	0
526	2	0		13	0	0	1	22	28	1	3	32	3	1	0	1	1	2	1	0	0	0	0	0	0	0	0					1	0	1	0	0	0	0	0	1	0	1	0	1	0	0	0	1	1
527	2	0		18	0	0	1	22	23	1	3	26	3	1	0	1	1	2	1	0	0	0	0	0	0	0	0					1	0	1	0	0	0	0	0	1	0	1	0	1	0	1	0	1	0
528	2	0		4	0	0	1	22	22	1	2	27	1	1	0	1	1	2	1	0	0	0	0	0	0	0	0					1	0	1	0	0	0	0	0	1	0	1	0	1	0	0	0	1	1
529	2	0		28	0	0	2	22	24	1	3	32	3	1	0	1	1	2	1	0	0	0	0	0	0	0	0					1	0	1	0	0	0	0	0	1	0	1	0	1	0	0	0	0	1
530	2	0		28	0	0	2	22	22	1	2		1	1	0	1	1	2	1	0	0	0	0	0	0	0	0					1	0	1	0	0	0	0	0	1	0	1	0	1	0	0	0	0	0
531	2	0		17	0	0	1	22	28	1	2	34	2	0		1	1	2	1	0	0	0	0	0	0	0	0					1	0	1	0	0	0	0	0	1	1	1	1	1	1	0	0	0	1
532	2	0		29	0	0	3	22	27	1	2	31	1	1		1	1	4	0	0	0	0	1	0	0	0	0					1	0	1	0	0	0	0	0	1	0	1	0	1	0	0	0	0	0
533	2	0		6	0	0	1	22	22	1	2	28	2	1	0	1	1	2	1	0	0	0	0	0	0	0	0					1	0	1	0	0	0	0	0	1	0	1	0	1	0	0	0	0	1
534	2	0		17	0	0	1	22	22	1	2	30	1	0		1	1	2	1	0	0	0	0	0	0	0	0					1	0	1	1	0	0	1	0	1	0	1	0	1	0	1	0	1	0
535	2	0		28	0	0	2	22	28	1	3	32	3	1	0	1	1	2	1	0	0	0	0	0	0	0	0					1	0	1	0	0	0	0	0	1	0	1	0	1	0	0	0	1	1
536	2	0		28	0	0	2	22	28	1	3	29	3	1	0	1	1	2	1	0	0	0	0	0	0	0	0					1	0	1	0	0	0	0	0	1	0	1	0	1	0	0	0	0	0
537	2	0		9	0	0	1	22	28	1	1	31	0	1	0	1	1	2	1	0	0	0	0	0	0	0	0					1	0	1	0	0	0	0	0	1	0	1	0	1	0	0	0	1	1
538	2	0		24	0	0	2	22	23	3	3	25	2	0		1	1	2	1	0	0	0	0	0	0	0	0					1	0	1	0	0	0	0	0	1	0	1	0	1	0	0	0	0	0
539	2	0		6	0	0	1	22	21	1	2	27	3	0		1	1	2	1	0	0	0	0	0	0	0	0					1	0	1	0	0	0	0	0	1	0	1	1	1	1	0	0	1	0
540	2	0		28	0	0	2	22	35	1	1	37	1	0		1	1	2	1	0	0	0	0	0	0	0	0					1	0	0	0	0	0	0	0	1	0	1	1	1	0	0	0	0	0
541	2	0		32	0	0	3	22	36	1	2	44	2	1	0	1	1	2	1	0	0	0	0	0	0	0	0					1	0	1	0	0	0	0	0	1	1	1	1	1	1	0	0	1	1
542	2	1	1	28	1	0	2	22	23	1	2	34	2	0		1	1	2	1	0	0	0	0	0	0	0	0					1	0
543	2	0		28	0	0	2	22	43	1	1	52	0	0		1	1	2	1	0	0	0	0	0	0	0	0					1	0	0	0	0	0	0	0	1	0	1	0	1	0	0	0	0	1
544	2	0		21	0	0	2	22	22	3	3	25	3	0		1	1	2	1	0	0	0	0	0	0	0	0					1	0	0	0	0	0	0	0	1	0	1	0	1	0	0	0	0	1
545	2	1	0	26	0	1	2	22	24	1	3	28	3	1	0	1	1	2	1	0	0	0	0	0	0	0	0					1	0	0	0	0	0	0	0	1	0	1	0	1	0	0	0	0	0
546	2	0		16	0	0	1	22	23	1	3	29	3	0		1	1	2	1	0	0	0	0	0	0	0	0					1	0	1	0	0	0	0	0	1	0	1	0	1	0	0	0	1	0
547	2	0		21	0	0	2	22	22	3	3	29	3	1	0	1	1	2	1	0	0	0	0	0	0	0	0					1	0	1	0	0	0	0	0	1	0	1	0	1	0	0	0	0	0
548	2	0		7	0	0	1	22	21	1	3	23	3	1	0	1	1	2	1	0	0	0	0	0	0	0	0					1	0	1	0	0	0	0	0	1	0	1	0	1	0	0	0	0	1
549	2	0		20	0	0	1	22	21	3	2	24	3	0		1	1	2	1	0	0	0	0	0	0	0	0					1	0	0	0	0	0	0	0	1	0	1	0	1	0	0	0	0	0
550	2	0		4	0	0	1	22	23	1	2	30	1	1	0	1	1	2	1	0	0	0	0	0	0	0	0					1	0	1	0	0	0	0	0	1	1	1	1	1	0	1	0	0	0
551	2	0		16	0	0	1	22	23	1	2	25	2	1	0	1	1	2	1	0	0	0	0	0	0	0	0					1	0	1	0	0	0	0	0	1	0	1	0	1	0	0	0	1	1
552	2	0		32	0	0	3	23	24	1	3	27	2	0		1	1	3	0	0	0	0	1	0	0	1	1	0	0	0	1	0	0	1	0	0	0	0	0	1	0	1	1	1	1	1	0	1	1
553	2	0		31	0	0	3	23	27	1	2	29	1	0		1	1	4	0	0	0	0	1	0	0	0	1	0	0	0	1	1	0	1	0	0	0	0	0	1	0	1	1	1	0	1	0	1	1
554	2	0		17	0	0	1	23	29	1	3	29	3	99		1	1	4	0	0	0	0	1	0	0	1	1	0	0	1	0	1	0	1	1	0	0	0	1	1	0	0	0	1	0	1	0	1	0
555	2							23	18	3	2			0		1	1	1	1	0	0	0	1	0	0	1	0					1	1
556	2	0		32	0	0	3	23	19	1	2	22	1	0		1	1	3	0	0	0	0	1	0	0	1	1	0	0	0	1	1	0	1	0	0	0	0	0	1	0	1	0	1	0	1	0	1	0
557	2	0		21	0	0	2	23	18	1	3	25	3	1	0	1	1	4	0	0	0	0	1	0	0	0	0					1	0	1	0	0	0	0	0	1	0	0	0	0	0	0	0	1	0
558	2	0		10	0	0	1	23	18	1	2		3	0		1	1	4	1	0	0	0	1	0	0	1	0					1	0	1	0	0	0	0	0	1	0	1	0	1	1	1	0	1	0
559	2							23	19	1	3	24	3	1	0	1	1	1	1	0	0	0	1	0	0	1	0					0	1
560	2	0		36	0	0	3	23	20	3	2			99		1	1	4	1	0	0	0	0	0	0	1	0					1	0	1	0	0	0	0	0	1	0	1	0	1	0	0	0	1	0
561	2	0		24	0	0	2	23	28	1	3	35	1	99		1	1	4	1	0	0	0	1	0	0	0	0					1	0	1	0	0	0	0	0	1	0	1	0	1	1	1	0	1	0
562	2	0		25	0	0	2	23	26	1	2	31		99		1	1	4	0	0	0	0	0	0	0	1	1	0	0	0	1	1	0	1	0	0	0	0	0	1	0	0	0	1	0	1	1	1	1
563	2							23	37	1	3	32	3	0		1	1	2	1	0	0	0	0	0	0	0	1	0	0	0	1	1	1	1	0	0	0	0	0	0	0	0	0	1	0	0	0	1	0
564	2	0		30	0	0	3	23	27	1	1	40	1	0		1	1	4	1	0	0	0	0	0	0	1	1	0	0	0	1	0	0	1	1	0	0	0	1	1	0	0	0	1	0	1	0	1	1
565	2	0		31	0	0	3	23	29	1	3	32	3	0		1	1	4	1	0	0	0	1	0	0	1	0					1	0	1	0	0	0	0	0	1	0	1	0	1	1	1	0	1	0
566	2	0		28	0	0	2	23	31	1	2	34	1	1	0	1	1	3	1	0	1	0	1	0	0	0	1	0	0	0	1	0	0	1	1	0	0	0	0	1	0	1	0	1	1	1	1	1	1
567	2	0		28	0	0	2	23	26	1	2	27	2	1	0	1	1	4	1	0	0	0	0	0	0	1	0					1	0	1	1	0	0	0	1	1	0	1	0	1	0	1	0	1	1
568	2							23	27	3	3	30	3	0		0	0	3	1	0	0	0	1	0	0	1	0					1	1
569	2	0		28	0	0	2	23	23	1	2	46		1	1	1	1	3	1	0	0	0	0	0	0	0	0					1	0	1	1	0	0	0	1	1	0	1	0	1	0	0	0	0	1
570	2	0		28	0	0	2	23	29	1	2	34	1	1	0	1	1	3	1	0	0	0	0	0	0	0	1	0	0	0	1	1	0	1	1	0	0	0	1	1	0	1	0	1	0	1	1	1	0
571	2	0		32	0	0	3	23	20	3	3	22	1	99		1	1	1	1	0	0	0	0	0	0	0	0					1	0	1	0	0	0	0	0	1	0	1	0	1	0	1	0	1	0
572	2	0		28	0	0	2	23	21	3	2	22	3	99		0	0	4	1	0	0	0	0	0	0	0	0					1	0	0	0	0	0	0	0	1	0	1	1	1	0	0	0	1	1
573	2	0		15	0	0	1	23	19	1	3	23	1	0		1	1	4	0	0	0	0	0	0	0	0	0					1	0	1	0	0	0	0	0	1	0	1	0	1	1	1	0	1	0
574	2	0		32	0	0	3	23	40	1	3	45	3	1	0	1	1	3	1	0	0	0	1	0	0	0	0					1	0	1	0	0	0	0	0	1	0	1	0	1	1	1	0	1	0
575	2	0		28	0	0	2	23	20	1	2	23	2	99		1	1	2	1	0	0	0	1	0	0	1	0					0	0	1	0	0	0	0	0	1	0	1	0	1	1	1	0	1	0
576	2	0		28	0	0	2	23	29	1	1	32	1	0		1	1	3	1	0	0	0	0	0	0	0	0					1	0	0	0	0	0	0	0	1	0	0	0	1	0	0	0	1	1
577	2	0		20	0	0	1	23	35	1	3	34	3	1	0	1	1	3	1	0	0	0	0	0	0	1	0					0	0	1	0	0	0	0	0	1	0	1	0	1	1	1	0	1	0
578	2	0		20	0	0	1	23	25	1	3	27	3	0		1	1	4	0	0	0	0	1	0	0	1	0					1	0	1	0	0	0	0	0	1	0	0	0	1	1	1	0	1	1
579	2	0		19	0	0	1	23	18	1	3	24	3	1	0	1	1	4	1	0	0	0	1	0	0	0	0					1	0	1	0	0	0	0	0	1	0	0	0	1	0	0	0	1	1
580	2	0		32	0	0	3	23	19	1	2	22	2	1	0	1	1	3	1	0	0	0	0	0	0	1	0					1	0	0	0	0	0	0	0	1	0	0	1	1	0	1	1	1	0
581	2	0		32	0	0	3	23	17	3	2	22	3	1	0	1	2	4	1	0	0	0	0	0	0	0	0					1	0	1	0	0	0	0	0	1	0	1	0	1	1	1	0	1	0
582	2	0		17	0	0	1	23	33	1	3	35	1	1	0	1	1	3	1	0	0	0	1	0	0	1	0					1	0	1	0	0	0	0	0	1	0	1	1	1	1	1	0	1	1
583	2	0		28	0	0	2	23	25	1	1	30	2	0		1	1	4	1	0	0	0	0	0	0	0	1	0	0	0	1	1	0	1	0	0	0	0	0	1	0	1	0	1	0	0	0	1	1
584	2	0		32	0	0	3	23	26	1	1	36	3	1	0	0	0	4	1	0	0	0	0	0	0	0	0					1	0	1	0	0	0	0	0	1	0	1	1	1	1	1	0	1	0
585	2							23	30	1	3	33	3	1	0	1	1	4	1	0	0	0	0	0	0	0	0					1	1
586	2	0		32	0	0	3	23	29	1	3	30	3	0		1	1	2	1	0	0	0	0	0	0	1	1	0	0	0	1	1	0	1	0	0	0	0	0	1	0	1	0	1	1	1	0	1	1
587	2	0		15	0	0	1	23	20	1	2	29	1	0		0	0	4	1	0	0	0	0	0	0	1	0					0	0	1	0	0	0	0	0	1	0	1	0	1	0	1	0	1	1
588	2	0		37	0	0	3	23	20	1	3	25	3	0		1	1	4	0	0	0	0	0	1	0	0	0					1	0	1	1	0	0	0	1	1	0	1	0	1	1	1	0	1	1
589	2	0		15	0	0	1	23	32	1	3	38	2	99		1	1	4	1	0	0	0	1	0	0	0	0					1	0	1	1	0	0	0	1	1	0	1	0	1	0	1	0	1	1
590	2	0		24	0	0	2	23	26	1	2		2	1	0	1	1	4	1	0	1	0	0	1	0	0	0					1	0	1	1	0	0	0	1	1	0	0	0	1	0	1	0	1	1
591	2	0		28	0	0	2	23	24	1	3	27	3	1	0	1	1	2	1	0	0	0	1	0	0	1	0					1	0	1	1	0	0	0	1	1	0	1	0	1	1	1	0	1	1
592	2							23	18	1	1	22	2	0		1	1	4	1	0	0	0	0	0	0	0	0					1	1	0	0	0	0	0	0	0	0	0	0	1	0	0	0	0	0
593	2	0		24	0	0	2	23	24	1	3	30	3	1	0	1	1	3	0	0	0	0	0	1	0	0	0					0	0	1	0	0	0	0	0	1	0	1	0	1	0	0	0	1	1
594	2	0		17	0	0	1	23	33	1	3	36	3	99		1	1	4	0	0	0	0	1	0	1	0	0					1	0	1	0	0	0	0	0	1	0	1	1	1	0	1	0	1	1
595	2	0		32	0	0	3	23	20	1	1	22	1	1	0	1	1	4	1	0	0	0	1	0	0	1	0					1	0	1	0	0	0	0	0	1	0	1	0	1	1	1	0	1	1
596	2	0		23	0	0	2	23	18	1	2	27	1	1	0	1	1	1	0	0	0	0	0	0	0	0	1	0	0	0	1	0	0	1	1	0	0	0	1	1	0	1	0	1	0	1	0	1	1
597	2	0		32	0	0	3	23	20	1	2	22	3	0		0	0	4	1	0	1	1	0	0	0	1	0					0	0	1	0	0	0	0	0	1	0	1	0	1	0	1	0	1	1
598	2							23	21	3	3	27		99		1	2	4	1	0	0	0	0	0	0	1	0					0	1	1	0	0	0	0	0	1	0	1	0	1	0	1	0	1	0
599	2							23	21	1	2	23	2	99		0	0	1	1	0	0	0	0	0	0	0	0					1	1	0	0	0	0	0	0	0	0	0	0	1	0	0	0	0	1
600	2	0		25	0	0	2	23	32	1	3	35	3	1	0	1	1	3	1	1	0	0	1	0	0	0	0					1	0	1	1	0	0	0	1	1	0	1	0	1	1	1	0	1	1
601	2	0		19	0	0	1	23	17	3	3		3	99		1	1	2	1	0	0	0	0	0	0	1	0					1	0	0	0	0	0	0	0	1	0	1	0	0	1	0	0	1	1
602	2	0		29	0	0	3	23	20	1	3	28	3	99		1	1	3	1	0	0	0	1	0	0	1	0					1	0	1	0	0	0	0	0	1	0	1	0	1	1	1	0	1	0
603	2	0		36	0	0	3	23	21	1	2	27	3	1	0	1	1	2	1	1	1	0	1	0	0	0	0					1	0	1	0	0	0	0	0	1	0	1	0	1	0	1	0	1	1
604	2							23	40	1	3	39	3	1	0	1	1	4	0	0	0	0	1	0	0	0	0					1	1
605	2	0		25	0	0	2	23	37	1	3	45	3	1	0	1	1	4	0	0	0	0	1	0	0	1	0					1	0	0	0	0	0	0	0	1	0	0	0	1	0	0	0	1	0
606	2							23	20	1	2	32	1	99		0	0	4	0	0	0	0	1	0	0	0	0					1	1
607	2	0		21	0	0	2	23	19	1	2	22		99		1	1	2	1	0	0	0	0	0	0	0	0					1	0	1	0	0	0	0	0	1	0	1	0	1	1	1	0	1	1
608	2	0		34	0	0	3	23	32	1	1	35	1	99		1	1	4	1	1	1	0	0	0	0	0	0					1	0	1	0	0	0	0	0	1	0	1	0	1	0	1	0	1	1
609	2	0		28	0	0	2	23	25	1	3	28	3	0		1	1	4	1	0	0	0	0	0	0	1	0					1	0	1	0	0	0	0	0	1	0	1	0	1	0	0	0	1	0
610	2	0		25	0	0	2	23	18	3	2	30	3	99		1	1	1	1	0	0	0	0	0	0	1	0					0	0	0	0	0	0	0	0	1	0	0	0	1	1	0	0	0	0
611	2							23	29	1	2	36	3	1	0	1	1	4	1	0	0	0	0	0	1	0	0					1	1
612	2	0		23	0	0	2	23	18	1	2		2	0		1	1	3	1	0	0	0	1	0	0	1	0					1	0	1	0	0	0	0	0	1	0	1	0	1	0	0	0	1	0
613	2	0		36	0	0	3	23	26	1	3	27	1	1	0	1	1	4	1	0	0	0	0	0	0	1	0					1	0	1	1	0	0	0	1	1	0	1	0	1	0	1	0	1	0
614	2	0		21	0	0	2	23	21	1	2	23	1	99		1	1	2	1	0	0	0	0	0	0	0	0					1	0	1	0	0	0	0	0	1	0	0	0	1	1	1	0	1	1
615	2							23	29	1	2	30	2	1	0	1	1	4	1	0	0	0	0	0	0	1	0					1	1
616	2	0		36	0	0	3	23	31	1	3	33	3	1	0	1	1	4	1	0	0	0	0	0	0	1	1	0	0	0	1	1	0	1	0	0	0	0	0	1	0	1	0	1	0	1	0	1	1
617	2	0		21	0	0	2	23	25	1	3	35	1	0		1	1	4	0	0	0	0	0	0	0	1	1	0	0	0	1	1	0	1	0	0	0	0	0	1	0	1	0	1	0	1	0	1	1
618	2							23	29	1	3	34		0		1	1	4	1	0	0	0	0	0	0	0	0					1	1
619	2	0		18	0	0	1	23	18	1	3	23	3	0		1	1	3	1	0	0	0	0	0	0	1	0					1	0	1	0	0	0	0	0	1	0	1	0	1	0	1	0	1	0
620	2	0		18	0	0	1	23	19	1	1	32	1	1	0	1	1	4	1	0	0	0	1	0	0	1	0					1	0	1	0	0	0	0	0	1	0	0	0	0	0	0	0	1	0
621	2	0		5	0	0	1	23	29	1	2	30	2	1	0	1	1	4	1	0	0	0	1	0	0	0	0					1	0	1	0	0	0	0	0	1	0	0	0	0	1	1	0	1	1
622	2	0		36	0	0	3	23	22	1	1	26	1	0		1	1	3	1	0	0	0	0	0	0	0	0					1	0	1	0	0	0	0	0	1	0	1	0	1	0	1	0	1	0
623	2	0		17	0	0	1	24	37	1	3	42	2	1	0	1	1	4	1	0	0	0	0	0	1	0	1	0	0	0	1	1	0	1	0	0	0	0	0	1	0	1	0	1	0	0	0	0	0
624	2	0		10	0	0	1	24	28	3	3	30	3	0		1	1	2	1	0	0	0	0	0	0	1	0					1	0	1	0	0	0	0	0	1	0	0	0	1	0	0	0	1	1
625	2	0		12	0	0	1	24	23	1	1	28	1	99		1	1	4	1	0	0	0	0	0	0	0	0					1	0	1	0	0	0	0	0	1	0	0	0	1	0	0	0	1	1
626	2	0		12	0	0	1	24	27	1	1	30	2	0		1	1	4	1	0	0	0	0	0	0	0	1	0	0	0	1	1	0	1	0	0	0	0	0	1	0	0	0	1	0	0	0	1	0
627	2	0		20	0	0	1	24	20	1	1	28	2	99		1	1	3	1	0	0	0	0	0	0	0	0					1	0	1	0	0	0	0	0	1	0	1	0	1	0	0	0	1	0
628	2							24	21	1	3	30	2	0		1	1	4	1	0	1	0	0	0	0	0	1	0	0	0	1	0	1
629	2	0		26	0	0	2	24	22	1	3	29	3	0		1	1	3	1	0	0	0	1	0	0	1	0					1	0	1	0	0	0	0	0	1	0	1	0	1	0	0	0	1	0
630	2	0		32	0	0	3	24	33	1	2	34	1	0		1	1	3	1	0	0	0	1	0	0	0	0					1	0	1	0	0	0	0	0	1	0	1	0	1	0	0	0	0	0
631	2	0		17	0	0	1	24	24	1	3	28	0	1	0	1	1	2	1	0	0	0	1	0	0	0	1	0	0	0	1	1	0	1	0	0	0	0	0	1	0	1	1	1	0	0	0	1	0
632	2	0		19	0	0	1	24	25	1	2	28	3	1	0	1	1	4	1	0	0	0	1	0	0	0	1	0	0	0	0	1	0	1	0	0	0	0	0	1	0	1	0	1	0	0	0	1	0
633	2	0		17	0	0	1	24	26	1	3	28	2	0		1	1	4	1	0	0	0	0	0	0	1	0					0	0	1	1	0	0	0	1	1	0	0	0	1	0	0	0	1	0
634	2	0		19	0	0	1	24	23	3	3	25	3	99		1	1	4	1	0	0	0	0	0	1	0	0					1	0	1	0	0	0	0	0	1	0	0	0	1	0	0	0	1	0
635	2							24	21	1	2	23	2	0		1	1	4	1	0	0	0	0	0	0	0	1	0	0	0	1	0	1
636	2	0		21	0	0	2	24	24	1	3	28	3	0		1	1	3	1	0	0	0	0	0	0	1	1	0	0	0	1	1	0	1	0	0	0	0	0	1	0	0	0	1	0	0	0	1	0
637	2	0		28	0	0	2	24	21	1	2	24	1	0		1	1	4	1	0	0	0	0	0	0	0	0					0	0	1	1	0	0	0	1	1	0	0	0	1	0	0	0	0	0
638	2							24	20	1	3	27	3	0		1	1	4	0	0	0	0	0	1	0	0	1	0	0	0	1	1	1	1	0	0	0	0	0	1	0	0	0	0	0	0	0	0	1
639	2	0		34	0	0	3	24	29	1	3	33	1	0		1	1	4	1	0	1	0	0	0	0	0	1	0	0	0	1	0	0	1	0	0	0	0	0	1	0	1	0	1	0	0	0	1	0
640	2	0		35	0	0	3	24	26	1	1	27	1	0		1	1	4	1	0	0	0	0	0	0	1	0					1	0	1	0	0	0	0	0	1	0	0	0	1	0	0	0	1	0
641	2	0		28	0	0	2	24	31	1	1	36	1	0		1	1	3	1	0	0	0	0	0	0	0	0					0	0	1	0	0	0	0	0	1	0	1	0	1	0	0	0	1	0
642	2	0		22	0	0	2	24	25	3	3			99		1	1	3	1	0	1	0	0	0	0	1	0					1	0	0	0	0	0	0	0	1	0	1	0	1	0	0	0	1	1
643	2	0		14	0	0	1	24	34	1	2	37	2	99		1	1	4	1	0	0	0	0	0	0	1	0					1	0	1	0	0	0	0	0	1	0	1	0	1	0	0	0	1	0
644	2	0		18	0	0	1	24	21	1	3	30	3	0		1	1	4	1	0	0	0	0	0	0	1	0					1	0	1	0	0	0	0	0	1	0	1	0	1	0	0	0	1	0
645	2	0		29	0	0	3	24	20	3	2	26	2	0		1	1	3	1	0	0	0	1	0	0	0	0					1	0	1	0	0	0	0	0	1	0	1	0	1	0	0	0	0	1
646	2	0		28	0	0	2	24	20	1	2	23	1	0		1	1	4	1	0	0	0	1	0	0	0	0					1	0	1	0	0	0	0	0	1	0	1	0	1	0	0	0	1	0
647	2	0		15	0	0	1	24	24	1	3	30	3	0		1	1	4	1	0	0	0	1	0	0	1	0					1	0	1	0	0	0	0	0	1	0	1	0	1	0	0	0	1	0
648	2							24	22	1	2	32	1	0		1	1	4	1	0	0	0	0	0	0	0	0					1	1
649	2	0		10	0	0	1	24	33	1	2	34	3	99		1	1	4	1	0	0	0	1	0	0	0	1	0	0	0	1	1	0	1	0	0	0	0	0	1	0	0	0	1	0	0	0	1	0
650	2	0		14	0	0	1	24	27	3	3	31	3	99		0	0	3	1	0	0	0	0	0	0	1	1	0	0	0	1	0	0	1	1	0	0	0	1	1	0	1	0	1	0	0	0	0	1
651	2							24	28	1	3	32	3	99		1	1	4	0	0	0	0	1	0	0	1	1	0	0	1	0	1	1
652	2	0		23	0	0	2	24	26	1	3	31		99		1	1	4	1	0	0	0	0	0	0	0	0					1	0	1	0	0	0	0	0	1	0	1	0	1	0	0	0	1	1
653	2	0		27	0	0	2	24	34	1	2		1	0		1	1	3	0	0	0	0	0	1	0	0	1	0	0	0	1	1	0	1	0	0	0	0	0	1	0	0	0	1	0	0	0	1	0
654	2							24	30	1	1	31	2	1	0	1	2	4	1	0	0	0	0	0	0	1	0					1	1	0	0	0	0	0	0	0	0	0	0	1	0	0	0	0	0
655	2	0		24	0	0	2	24	18	3	1	24	3	0		1	1	4	1	0	0	0	0	0	0	1	1	0	0	0	1	1	0	1	0	0	0	0	0	1	0	0	0	1	0	0	0	1	0
656	2	0		31	0	0	3	24	22	1	2	26	2	0		1	1	3	0	0	0	0	1	0	0	0	0					1	0	1	0	0	0	0	0	1	0	0	0	1	0	0	0	1	0
657	2	0		27	0	0	2	24	41	1	1	45	1	0		1	1	3	0	0	0	0	1	0	0	0	1	0	0	0	1	1	0	0	0	0	0	0	0	1	0	0	0	1	0	0	0	0	0
658	2	0		20	0	0	1	24	22	1	3	28	3	0		1	1	4	1	0	0	0	0	0	1	0	0					1	0	1	0	0	0	0	0	1	0	0	0	1	0	0	0	0	1
659	2							24	17	1	3	23	3	99		1	1	4	1	0	0	0	0	0	0	1	1	0	0	0	1	1	1
660	2	0		25	0	0	2	24	18	3	3	23	3	99		1	1	3	1	0	0	0	0	0	0	1	0					1	0	0	0	0	0	0	0	1	0	0	0	1	0	0	0	0	0
661	2	0		26	0	0	2	24	27	1	3	30	3	1	0	1	1	3	0	0	0	0	1	0	0	0	0					1	0	1	1	0	0	0	1	1	0	0	0	1	0	0	0	1	0
662	2	0		31	0	0	3	24	27	1	3	30	2	99		1	1	4	1	0	0	0	0	0	0	0	1	0	0	0	1	1	0	1	1	0	0	0	1	1	0	0	0	1	0	0	0	1	0
663	2	0		16	0	0	1	24	31	1	3	38	3	99		1	1	4	1	0	0	0	0	0	1	0	0					1	0	1	0	0	0	0	0	1	0	1	0	1	0	0	0	1	0
664	2							24	28	1	3	31	3	99		1	1	4	1	0	0	0	1	0	0	0	0					1	1
665	2	0		27	0	0	2	24	31	2	2		2	0		1	1	4	1	0	0	0	1	0	0	0	0					1	0	1	0	0	0	0	0	1	0	1	0	1	0	0	0	1	0
666	2							24	21	3	3	21	3	99		1	1	3	1	0	0	0	0	0	1	0	0					1	1	0	0	0	0	0	0	1	0	0	0	1	0	0	0	0	0
667	2	0		26	0	0	2	24	20	1	2	25	1	99		1	1	4	1	0	0	0	0	0	0	0	1	0	0	0	1	1	0	1	0	0	0	0	0	1	0	1	0	1	0	0	0	1	0
668	2	0		22	0	0	2	24	20	1	2	25	1	0		1	1	4	0	0	0	0	1	0	0	0	0					1	0	1	1	0	0	0	1	1	0	0	0	1	0	0	0	1	0
669	2	0		20	0	0	1	24	18	1	1	27	1	0		1	1	4	1	0	0	0	0	0	0	0	0					0	0	1	1	0	0	0	1	1	0	0	0	1	0	0	0	1	0
670	2	0		25	0	0	2	24	21	3	2	24	2	99		1	1	4	1	0	0	0	0	0	0	1	0					1	0	1	0	0	0	0	0	1	0	1	0	1	0	0	0	1	0
671	3	0		14	0	0	1	31	28	1	3	35	1	1	0	1	1	4	1	0	0	0	0	0	0	1	0					1	0	1	0	0	0	0	0	1	1	0	1	1	1	1	0	1	0
672	3	0		16	0	0	1	31	24	1	3	31	3	1	0	1	1	3	1	0	0	0	0	0	0	1	0					1	0	1	1	0	0	0	1	1	0	1	0	1	0	1	0	1	0
673	3	0		17	0	0	1	31	18	1	2	23	1	0		1	1	4	0	0	0	0	0	1	0	0	0					1	0	1	1	0	0	0	1	1	0	1	0	1	1	0	0	1	0
674	3	0		20	0	0	1	31	19	3	2	20	2	99		1	1	1	1	0	0	0	0	0	0	1	0					1	0	1	0	0	0	0	0	1	1	1	1	1	1	1	0	1	0
675	3	0		20	0	0	1	31	24	1	3	28	2	0		1	1	2	1	0	0	0	1	0	0	1	0					1	0	0	0	0	0	0	0	1	0	1	0	1	0	1	0	1	0
676	3							31	24	1	3	27	3	1	0	1	1	4	0	1	1	0	1	0	0	1	0					1	1	1	0	0	0	0	0	0	0	0	0	1	0	0	0	1	0
677	3	1	0	38	0	1	3	31	15	3	2	17	2	99		0	0	1	0	0	0	0	0	0	1	1	0					1	0	0	0	0	0	0	0	1	0	1	0	1	0	0	0	0	1
678	3	0		22	0	0	2	31	32	1	3	37	2	99		1	1	4	0	0	0	0	1	0	0	1	0					0	0	1	0	0	0	0	0	1	0	1	0	1	0	0	0	1	1
679	3	0		28	0	0	2	31	17	1	3	19	3	99		1	1	4	0	0	0	0	0	1	0	0	0					1	0	1	0	0	0	0	0	1	0	1	0	1	1	1	0	1	0
680	3							31	25	1	2	30	3	1	0	1	1	2	1	0	0	0	0	0	0	0	0					1	1	0	0	0	0	0	0	1	0	0	0	1	0	0	0	0	0
681	3	0		32	0	0	3	31	39	1	1	53	1	1	0	0	0	4	0	0	0	0	0	1	0	0	0					1	0	1	0	0	0	0	0	1	0	1	0	1	1	1	0	1	1
682	3	0		20	0	0	1	31	22	1	1	22	3	1	0	1	1	4	0	0	0	0	1	0	0	1	0					1	0	1	1	0	0	0	1	1	0	1	0	1	0	0	0	1	1
683	3	0		14	0	0	1	31	17	3	2	19	3	0		1	1	2	0	0	0	0	0	1	0	0	0					1	0	1	0	0	0	0	0	1	0	1	1	1	1	0	0	0	0
684	3							31	24	2	2	26	1	0		1	1	4	0	0	0	0	0	1	0	0	0					1	1
685	3	0		24	0	0	2	31	31	1	3	35	3	1	1	1	1	2	0	0	0	0	0	1	0	0	0					1	0	1	0	0	0	0	0	1	0	1	0	1	0	0	0	1	1
686	3							31	18	3	2	20	3	0		1	1	2	1	0	0	0	0	0	0	1	0					1	1	0	0	0	0	0	0	0	0	1	0	1	0	0	0	1	0
687	3	0		28	0	0	2	31	20	3	2	23	3	0		1	1	2	1	0	0	0	0	0	0	1	1	0	1	0	0	1	0	1	0	0	0	0	0	1	0	1	1	1	0	0	0	1	0
688	3	0		25	0	0	2	31	30	1	1	36	1	1	0	1	1	2	1	0	0	0	0	0	0	0	0					0	0	1	0	0	0	0	0	1	0	1	1	1	0	0	0	0	0
689	3	0		24	0	0	2	31	18	3	1	20	2	1		1	1	4	0	0	0	0	0	1	0	0	0					1	0	0	0	0	0	0	0	1	0	1	0	1	0	0	0	1	0
690	3	0		35	0	0	3	31	30	1	1			99		1	1	4	0	0	0	0	1	0	0	0	0					1	0	1	1	0	0	0	1	1	0	1	0	1	0	0	0	1	1
691	3							31	21	1	3	27	2	99		0	0	4	0	0	0	0	1	0	0	0	0					0	1	0	0	0	0	0	0	1	0	1	0	1	0	0	0	1	0
692	3	0		36	0	0	3	31	27	1	1		2	99		1	1	4	0	0	0	0	0	1	0	0	1	0	0	0	1	1	0	1	0	0	0	0	0	1	0	1	0	1	0	0	0	1	1
693	3	0		27	0	0	2	31	24	1	2	28	1	99		1	1	4	0	0	0	0	1	0	0	1	0					1	0	1	0	0	0	0	0	1	0	1	0	1	1	1	0	1	0
694	3	0		29	0	0	3	31	34	1	1	47	1	1	0	1	1	4	0	0	0	0	0	1	0	0	0					1	0	1	0	0	0	0	0	1	0	0	0	0	1	1	0	1	0
695	3	0		21	0	0	2	31	18	1	2			0		1	1	2	1	0	0	0	1	0	0	1	0					1	0	1	0	0	0	0	0	1	0	1	0	1	1	1	0	1	0
696	3	0		36	0	0	3	31	25	1	3	28	3	1	0	1	1	2	1	0	0	0	1	0	0	1	0					1	0	1	0	0	0	0	0	1	0	1	0	1	0	0	0	0	0
697	3							31	22	3	2		3	99		1	1	2	1	0	0	0	1	0	0	0	1	0	0	0	1	1	1
698	3	0		14	0	0	1	31	26	3	3			1	0	1	1	2	1	0	0	0	0	0	0	1	0					1	0	1	0	0	0	0	0	1	0	1	1	1	1	1	0	1	0
699	3	0		19	0	0	1	31	24	1	2	26	2	0		1	1	2	0	0	0	0	1	0	0	1	0					1	0	1	0	0	0	0	0	1	0	1	0	1	1	0	0	1	0
700	3	0		19	0	0	1	31	17	1	2	26	3	0		1	1	2	0	1	1	0	1	0	0	1	0					1	0	1	0	0	0	0	0	1	0	0	0	0	1	0	0	1	1
701	3							31	24	1	1	32	1	0		1	1	4	0	0	0	0	0	0	0	1	0					1	1
702	3	0		21	0	0	2	31	17	1	1	23	1	0		1	1	2	1	0	0	0	1	0	0	1	0					1	0	1	0	0	0	0	0	1	0	1	0	1	1	1	0	1	0
703	3							31	19	1	2	24	3	1	0	1	1	2	1	0	0	0	1	0	0	1	0					1	1
704	3	0		11	0	0	1	31	29	1	3	35	3	1	0	1	1	4	0	0	0	0	1	0	0	1	0					1	0	1	0	0	0	0	0	1	0	1	0	1	1	1	0	1	0
705	3	0		17	0	0	1	31	37	1	2		3	0		0	0	3	0	0	0	0	0	1	0	0	0					1	0	1	0	0	0	0	0	1	0	0	0	0	0	1	0	1	1
706	3	0		26	0	0	2	31	18	3	2	18	2	0		1	1	2	1	0	0	0	1	0	0	1	0					1	0	1	0	0	0	0	0	1	0	1	0	0	0	0	0	0	1
707	3	0		29	0	0	3	31	20	1	3	23	2	0		1	1	3	0	0	0	0	1	0	0	1	0					1	0	1	0	0	0	0	0	1	0	1	1	1	0	1	0	1	1
708	3	0		37	0	0	3	31	18	1	2	21	2	0		1	1	1	1	0	0	0	0	0	0	1	0					1	0	1	0	0	0	0	0	1	0	1	0	1	0	0	0	0	1
709	3	0		30	0	0	3	31	21	3	3	24	3	99		1	1	4	0	0	0	0	1	0	0	1	0					1	0	1	0	0	0	0	0	1	1	1	1	1	1	1	0	1	0
710	3	0		28	0	0	2	31	33	1	2	38	3	1	0	1	1	4	0	0	0	0	0	0	0	0	0					0	0	1	0	0	0	0	0	1	1	1	1	1	1	1	0	0	1
711	3	0		38	0	0	3	31	21	3	2		2	0		1	1	1	1	0	0	0	0	0	0	1	0					1	0	1	0	0	0	0	0	1	0	1	0	1	1	1	0	1	0
712	3	0		27	0	0	2	31	21	1	3	26	2	1	0	1	1	2	0	0	0	0	1	0	0	1	0					1	0	1	0	0	0	0	0	1	0	1	0	1	1	1	0	1	0
713	3							31	19	1	3	20	3	99		1	1	3	1	0	0	0	1	0	0	1	0					1	1
714	3	0		12	0	0	1	31	34	1	1	39	1	1	1	1	1	1	1	0	0	0	0	0	0	1	0					1	0	1	1	0	0	0	1	1	0	1	0	1	0	0	0	1	0
715	3	0		21	0	0	2	31	18	1	2	23	1	0		1	1	4	1	0	0	0	0	0	0	1	0					1	0	1	1	0	0	0	1	1	0	0	0	0	0	0	0	0	1
716	3	1	0	14	0	1	1	31	20	1	2	25	3	1	0	1	1	4	0	0	0	0	0	1	0	0	0					1	0	1	0	0	0	0	0	1	1	1	1	1	1	1	0	0	0
717	3	0		16	0	0	1	31	17	1	2	21	2	0		0	0	4	0	0	0	0	0	1	0	0	0					1	0	0	0	0	0	0	0	1	0	1	1	1	0	0	0	0	1
718	3	0		29	0	0	3	31	22	1	2	25	2	99		1	1	4	0	0	0	0	0	1	0	0	0					0	0	1	0	0	0	0	0	1	0	1	1	1	1	1	0	1	0
719	3	0		24	0	0	2	31	21	1	2	28	1	99		1	1	4	0	0	0	0	1	0	0	1	0					1	0	1	1	0	0	0	1	1	0	1	0	0	1	0	0	1	0
720	3	0		22	0	0	2	31	33	1	2	38	2	0		1	1	4	1	0	0	0	0	0	0	0	0					1	0	1	1	0	0	0	1	1	0	1	1	1	0	1	0	0	1
721	3	0		24	0	0	2	31	30	1	1	40	1	1	0	1	1	4	0	1	0	0	1	0	0	0	0					1	0	1	0	0	0	0	0	1	0	1	0	1	1	1	0	1	0
722	3	0		30	0	0	3	31	29	3	3	34	0	1	0	1	1	3	1	0	0	0	1	0	0	0	1	0	0	0	1	1	0	1	1	0	0	0	1	1	0	1	0	1	0	0	0	0	0
723	3							31	22	1	1	26		99		1	1	4	0	0	0	0	1	0	0	0	0					0	1
724	3	0		26	0	0	2	33	30	1	1	40	1	0		1	1	4	0	0	0	0	1	0	0	1	1	0	0	0	1	1	0	1	0	0	0	0	0	1	0	1	0	1	0	0	0	1	0
725	3							33	22	1	2		1	1	1	1	1	3	0	0	0	0	0	1	0	0	1	0	0	0	1	1	1	1	0	0	0	0	0	1	0	1	0	0	0	1	0	1	0
726	3	0		37	0	0	3	33	27	1	3	29	3	1	0	1	1	4	0	0	1	0	1	0	0	1	0					1	0	1	0	0	0	0	0	1	0	1	0	1	0	1	0	1	1
727	3	0		32	0	0	3	33	43	1	1	55	0	1	1	1	1	3	0	0	0	0	1	0	0	1	1	0	0	0	1	1	0	1	0	0	0	0	0	1	0	1	0	1	0	1	0	1	0
728	3	0		34	0	0	3	33	20	3	3	26	3	1	0	1	1	2	1	0	1	0	0	0	0	0	0					0	0	0	0	0	0	0	0	1	0	1	0	1	0	0	0	1	0
729	3	0		29	0	0	3	33	40	1	1	51	2	1	0	1	1	4	0	0	1	0	1	0	0	1	0					0	0	1	0	0	0	0	0	1	0	1	0	0	0	1	0	1	1
730	3	0		10	0	0	1	33	21	3	3	29	3	1	0	1	1	4	0	0	1	0	1	0	0	1	0					1	0	1	0	0	0	0	0	1	0	1	0	1	0	1	0	1	0
731	3	0		36	0	0	3	33	25	1	3	28	1	0		1	1	4	0	0	0	0	1	0	0	1	0					1	0	1	1	0	0	0	1	1	0	1	1	1	0	0	0	1	1
732	3	0		16	0	0	1	33	19	3	3	23	3	1	0	1	1	3	0	0	1	0	1	0	0	1	0					1	0	1	0	0	0	0	0	1	1	1	1	0	1	1	0	1	1
733	3	0		29	0	0	3	33	19	3	2	21	3	99		1	1	2	0	0	0	0	1	0	0	1	0					1	0	1	0	0	0	0	0	1	0	1	0	1	0	0	0	1	0
734	3	0		21	0	0	2	33	26	1	3	40	3	1	0	1	1	4	0	0	1	0	0	0	0	1	0					1	0	1	0	0	0	0	0	1	0	0	0	0	0	1	0	1	0
735	3	0		17	0	0	1	33	19	3	1		2	99		1	1	2	0	0	0	0	0	0	1	0	0					1	0	1	0	0	0	0	0	1	0	1	0	1	0	1	0	1	0
736	3	0		5	0	0	1	33	29	1	3	32	3	1	0	1	1	2	0	0	1	0	1	0	0	1	1	0	0	0	1	1	0	1	1	0	0	0	1	1	1	1	1	1	0	1	0	1	1
737	3	0		9	0	0	1	33	21	1	2	27	3	0		1	1	4	0	0	0	0	1	0	0	1	0					1	0	1	0	0	0	0	0	1	0	0	0	0	0	0	0	1	1
738	3	0		28	0	0	2	33	20	1	2	21	1	0		1	1	2	0	0	0	0	1	0	0	1	0					1	0	1	0	0	0	0	0	1	0	1	0	1	1	1	0	1	0
739	3							33	24	1	3	28	3	1	0	1	1	2	0	0	1	0	1	0	0	1	0					1	1
740	3	0		22	0	0	2	33	18	3	2	21	3	99		1	1	3	0	0	0	0	1	0	0	1	0					1	0	1	0	0	0	0	0	1	0	1	0	1	1	1	0	1	0
741	3	0		25	0	0	2	33	19	3	1	23	3	99		1	1	4	0	0	0	0	0	0	0	1	0					0	0	0	0	0	0	0	0	0	0	0	0	0	0	0	0	1	0
742	3	0		11	0	0	1	33	23	3	2	27	3	1	0	1	1	2	0	0	1	0	1	0	0	1	0					1	0	1	0	0	0	0	0	1	0	1	0	0	0	0	0	0	1
743	3							33	26	3	3	32	3	99		1	1	4	0	0	0	0	1	0	0	1	0					1	1	1	0	0	0	0	0	1	0	0	0	0	0	0	0	1	0
744	3	0		19	0	0	1	33	29	1	3	31	3	1	0	1	1	2	0	0	1	0	1	0	0	1	0					1	0	1	0	0	0	0	0	1	0	1	0	1	0	0	0	1	0
745	3	0		14	0	0	1	33	25	1	3	27	3	0		1	1	4	0	0	0	0	1	0	0	1	0					0	0	1	0	0	0	0	0	1	1	1	0	1	1	1	0	1	1
746	3	0		19	0	0	1	33	20	3	3	24	3	1	0	1	1	1	1	0	0	0	1	0	0	1	1	0	0	0	1	1	0	1	0	0	0	0	0	1	0	1	0	1	1	1	0	0	0
747	3	0		32	0	0	3	33	32	1	2	42	3	99		1	1	3	0	0	0	0	1	0	0	1	0					1	0	1	0	0	0	0	0	1	0	1	0	1	0	1	0	1	0
748	3	0		36	0	0	3	33	30	1	2	36	3	0		1	1	3	0	0	0	0	1	0	0	1	1	0	0	0	1	1	0	1	0	0	0	0	0	1	1	1	1	1	0	1	0	1	0
749	3	0		32	0	0	3	33	24	1	1	26	1	0		1	1	3	0	0	0	0	1	0	0	1	0					1	0	1	0	0	0	0	0	1	0	1	0	1	1	0	0	1	1
750	3	0		23	0	0	2	33	18	3	2		2	1	0	1	1	4	0	0	0	0	0	0	0	1	0					1	0	1	0	0	0	0	0	1	1	1	0	1	0	1	0	1	1
751	3	0		34	0	0	3	33	30	1	3	35	3	1	0	1	1	4	0	0	0	0	1	0	0	1	0					1	0	1	0	0	0	0	0	1	0	1	0	1	0	1	0	1	1
752	3	0		30	0	0	3	33	35	1	1	39		0		1	1	2	1	0	0	0	1	0	0	1	1	0	0	0	1	1	0	1	0	0	0	0	0	1	0	1	0	1	0	1	0	1	0
753	3	0		9	0	0	1	33	21	3	3	27	3	1	0	1	1	2	1	0	1	0	1	0	0	1	0					1	0	1	0	0	0	0	0	1	1	1	1	1	0	1	0	1	0
754	3	0		24	0	0	2	33	20	1	2	22	3	1	0	1	1	2	1	0	0	0	1	0	0	1	0					1	0	1	0	0	0	0	0	1	0	1	0	1	1	1	0	1	0
755	3	0		26	0	0	2	33	17	1	1	25		99		1	1	4	0	0	0	0	1	0	0	1	0					1	0	1	0	0	0	0	0	1	0	1	0	0	0	0	0	1	1
756	3	0		33	0	0	3	33	24	1	1	26		1	1	1	1	2	1	0	1	0	1	0	0	1	0					1	0	1	0	0	0	0	0	1	0	1	0	1	0	0	0	1	0
757	3	0		34	0	0	3	33	22	1	3		3	1	0	1	1	2	1	0	0	0	1	0	0	1	0					1	0	1	0	0	0	0	0	1	0	0	0	1	1	0	0	1	0
758	3	0		36	0	0	3	33	22	1	3	29	3	1	0	1	1	2	1	0	0	0	1	0	0	1	0					1	0	1	0	0	0	0	0	1	0	1	0	1	1	1	0	1	0
759	3	0		36	0	0	3	33	30	1	3	40	2	1	0	1	1	4	0	0	0	0	1	0	0	0	1	0	0	0	1	0	0	1	0	0	0	0	0	1	0	1	0	0	1	0	0	1	0
760	3	0		15	0	0	1	33	30	1	2		1	1	0	1	1	2	0	0	0	0	1	0	0	1	0					1	0	1	0	0	0	0	0	1	1	1	1	1	0	1	0	1	0
761	3	0		9	0	0	1	33	25	3	1		3	1	0	1	1	2	1	0	0	0	0	0	0	0	0					1	0	1	0	0	0	0	0	1	0	1	0	1	0	1	0	1	1
762	3	0		9	0	0	1	33	24	1	2		1	0		1	1	4	0	0	0	0	0	0	0	0	0					0	0	1	1	0	0	0	1	1	0	1	0	0	0	0	0	1	1
763	3	0		33	0	0	3	33	18	1	2	20	3	99		1	1	3	0	0	0	0	1	0	0	1	0					0	0	1	0	0	0	0	0	1	0	1	0	1	0	1	0	1	0
764	3	0		34	0	0	3	33	18	3	2	20	3	0		1	1	3	0	0	0	0	0	0	0	1	0					1	0	0	0	0	0	0	0	1	0	1	0	1	0	0	0	1	0
765	3	0		32	0	0	3	33	25	1	1	46	3	1	0	1	1	4	0	0	0	0	1	0	0	1	0					1	0	1	0	0	0	0	0	1	0	1	0	1	0	0	0	1	1
766	3							33	22	1	2			0		1	1	2	1	0	0	0	0	0	0	1	0					1	1
767	3	0		37	0	0	3	33	19	1	3	23	3	0		1	1	4	0	0	0	0	0	1	0	0	0					0	0	1	0	0	0	0	0	1	0	1	0	0	1	0	0	1	1
768	3							33	20	3	2	25		0		1	1	4	0	0	1	0	1	0	0	1	0					1	1
769	3							33	23	1	1	25	2	1	0	1	1	4	1	0	1	0	0	0	0	0	0					0	1	0	0	0	0	0	0	1	0	0	0	0	0	0	0	1	0
770	3							33	32	1	3	40	2	1	0	1	1	4	0	0	0	0	1	0	0	1	0					1	1	0	0	0	0	0	0	0	0	0	0	0	0	0	0	0	1
771	3	0		24	0	0	2	33	25	1	3	32	3	1	0	1	1	4	0	0	1	0	1	0	0	1	0					1	0	1	0	0	0	0	0	1	0	1	0	1	1	1	0	1	0
772	3	0		20	0	0	1	33	18	1	3	24	2	1	0	1	1	3	0	0	1	0	1	0	0	1	0					1	0	1	0	0	0	0	0	1	0	1	0	1	0	1	0	1	0
773	3	0		24	0	0	2	33	24	1	3	25	3	1	0	1	1	3	0	0	1	0	1	0	0	1	1	0	0	0	1	1	0	1	0	0	0	0	0	1	0	1	0	1	1	1	0	1	0
774	3	0		38	0	0	3	33	32	1	3	38	2	0		1	1	4	0	0	0	0	1	0	0	1	0					1	0	1	0	0	0	0	0	1	0	1	0	1	0	1	0	1	0
775	3	0		15	0	0	1	33	29	1	2	28	3	0		1	1	4	0	0	0	0	1	0	0	1	0					1	0	1	0	0	0	0	0	1	0	1	0	1	0	0	0	1	1
776	3	0		28	0	0	2	33	24	1	3	30	3	1	0	1	1	2	1	0	0	0	1	0	0	1	0					1	0	1	0	0	0	0	0	1	0	1	0	1	0	1	0	1	1
777	3	0		22	0	0	2	33	22	1	1	30	2	1	0	1	1	4	0	0	1	0	1	0	0	1	0					0	0	1	0	0	0	0	0	1	1	1	1	1	0	0	0	1	0
778	3	0		7	0	0	1	33	23	1	2	31	3	1	0	1	1	3	0	0	0	0	1	0	0	1	0					1	0	1	0	0	0	0	0	1	1	0	1	0	0	1	0	1	1
779	3	0		27	0	0	2	33	22	1	3	27	3	0		1	1	4	0	0	0	0	1	0	0	1	0					1	0	0	0	0	0	0	0	1	0	1	0	0	0	1	0	1	0
780	3							33	31	1	2		2	0		1	1	2	1	0	0	0	1	0	0	1	0					0	1	0	0	0	0	0	0	1	0	1	0	0	0	1	0	1	0
781	3	0		25	0	0	2	33	21	1	2		1	0		1	1	4	0	0	0	0	0	1	0	0	0					1	0	0	0	0	0	0	0	1	0	1	0	0	0	1	0	1	0
782	3	0		14	0	0	1	33	30	1	1	36	2	1	0	1	1	4	0	0	1	0	1	0	0	1	0					0	0	1	0	0	0	0	0	1	0	1	0	1	0	1	0	1	1
783	3	0		24	0	0	2	33	22	2	3	31	3	1	0	1	1	4	1	0	0	0	1	0	1	1	0					1	0	1	0	0	0	0	0	1	1	1	1	1	1	1	0	1	1
784	3	0		27	0	0	2	33	37	1	3	47	1	1		1	1	4	0	0	0	0	1	0	0	1	0					1	0	1	0	0	0	0	0	1	0	1	0	1	0	1	0	1	1
785	3	0		28	0	0	2	33	25	1	3	27	3	1	0	1	1	4	0	0	1	0	1	0	0	1	1	0	0	0	1	0	0	1	0	0	0	0	0	1	0	0	0	0	0	0	0	1	0
786	3	0		30	0	0	3	33	20	1	2	28	3	1	0	1	1	4	0	0	1	0	1	0	0	1	0					1	0	1	0	0	0	0	0	1	0	1	0	1	0	1	0	1	0
787	3	0		23	0	0	2	33	36	1	3	46	3	1	0	1	1	4	0	0	0	0	1	0	0	1	0					1	0	1	0	0	0	0	0	1	0	1	0	0	1	0	0	1	1
788	3	0		7	0	0	1	33	24	1	3	28	1	0		1	1	3	0	0	0	0	1	0	0	0	0					1	0
789	3	0		15	0	0	1	33	27	1	2	33	3	1	0	1	1	4	0	0	1	0	1	0	0	1	0					1	0	1	0	0	0	0	0	1	0	1	0	1	0	1	0	1	0
790	3	0		13	0	0	1	33	32	1	1	32	2	1	0	1	1	4	0	0	0	0	1	0	0	1	0					1	0	1	0	0	0	0	0	1	0	1	0	1	0	1	0	1	0
791	3	0		29	0	0	3	33	19	1	3	23	2	99		1	1	3	0	0	0	0	1	0	0	1	0					1	0	1	0	0	0	0	0	1	0	1	0	1	0	1	0	1	1
792	3	0		15	0	0	1	33	37	3	3	46	3	99		1	1	3	0	0	0	0	1	0	0	1	0					1	0	1	0	0	0	0	0	1	0	1	0	1	0	1	0	1	0
793	3	0		17	0	0	1	33	17	3	3	23	2	0		1	1	2	0	0	0	0	1	0	0	1	0					1	0	0	0	0	0	0	0	1	0	0	0	0	0	0	0	1	0
794	3	0		26	0	0	2	33	27	1	3	30	3	1	0	1	2	3	1	0	0	0	0	0	0	1	0					1	0	1	0	0	0	0	0	1	0	1	0	1	0	1	0	1	0
795	3	0		18	0	0	1	33	32	1	2	44	1	1	0	1	1	1	1	1	0	0	1	0	0	1	0					1	0	0	0	0	0	0	0	1	0	1	0	1	0	0	0	1	0
796	3	0		22	0	0	2	33	18	1	3	22	3	0		1	1	4	0	0	0	0	1	0	0	1	0					1	0	1	0	0	0	0	0	1	0	0	0	0	0	1	0	1	0
797	3	0		31	0	0	3	33	16	3	1	20	2	99		1	1	2	1	0	0	0	1	0	0	1	0					1	0	0	0	0	0	0	0	1	0	1	0	0	0	0	0	1	1
798	3	0		21	0	0	2	33	24	1	3		3	0		1	1	1	1	0	0	0	1	0	0	1	0					1	0	1	0	0	0	0	0	1	0	1	0	1	1	1	0	1	0
799	3	0		32	0	0	3	33	31	1	1		1	0		1	1	4	0	0	0	0	1	0	0	1	0					1	0	0	0	0	0	0	0	1	0	1	0	1	0	0	0	0	0
800	3	0		25	0	0	2	33	16	1	2	19	2	1	0	1	1	1	1	0	1	0	1	0	0	1	0					1	0	1	0	0	0	0	0	1	0	1	1	1	0	0	0	0	1
801	3	0		37	0	0	3	33	20	3	3	24	3	1	0	1	1	3	0	0	0	0	1	0	0	1	0					1	0	1	0	0	0	0	0	1	1	1	1	1	1	1	0	1	1
802	3	0		37	0	0	3	33	25	1	1	31		1	0	1	1	4	0	0	0	0	0	1	0	0	0					1	0	1	0	0	0	0	0	1	0	1	1	1	1	0	0	1	0
803	3	0		37	0	0	3	33	37	1	1	43	1	99		1	1	1	1	0	0	0	0	0	0	0	0					1	0	1	0	0	0	0	0	1	0	1	0	1	0	0	0	1	1
804	3	0		37	0	0	3	33	29	1	1	36	2	0		1	1	4	0	0	0	0	0	1	0	0	0					1	0	1	0	0	0	0	0	1	0	1	0	1	1	0	0	1	0
805	3	0		9	0	0	1	33	20	1	3	24	3	1	0	1	1	1	1	0	0	0	1	0	0	1	0					1	0	1	0	0	0	0	0	1	0	1	0	1	0	0	0	1	1
806	3	0		15	0	0	1	33	21	1	3	27	2	1	0	1	1	4	0	0	0	0	1	0	0	1	0					1	0	1	0	0	0	0	0	1	0	1	1	1	0	1	0	1	0
807	3	0		14	0	0	1	33	36	1	1	37	1	1	0	1	1	4	0	0	0	0	1	0	0	1	0					1	0	1	1	0	0	0	1	1	0	1	0	1	1	1	0	1	1
808	3	0		31	0	0	3	33	23	1	3	29	3	1	0	1	1	4	0	0	0	0	1	0	0	1	0					1	0	1	0	0	0	0	0	1	0	1	0	0	0	1	0	1	0
809	3	0		25	0	0	2	33	18	1	3	23	2	1	0	1	1	2	1	0	0	0	1	0	0	1	0					1	0	1	0	0	0	0	0	1	0	1	0	1	0	1	0	1	1
810	3	0		29	0	0	3	33	19	1	2	29	1	0		1	1	4	0	0	0	0	0	1	0	0	0					1	0	1	0	0	0	0	0	1	0	1	0	0	1	1	0	1	0
811	3	0		15	0	0	1	33	20	1	2	30	3	1	0	1	1	4	0	0	1	0	1	0	0	1	0					0	0	1	0	0	0	0	0	1	0	1	1	1	0	0	0	1	1
812	3	0		21	0	0	2	33	29	1	3	30	3	1	0	1	1	4	0	0	1	0	1	0	0	1	0					1	0	1	0	0	0	0	0	1	0	1	0	0	1	1	0	1	0
813	3	0		17	0	0	1	33	26	1	2	37	2	99		1	1	1	1	0	0	0	1	0	0	1	0					1	0	1	0	0	0	0	0	1	0	1	0	1	0	0	0	1	0
814	3	0		17	0	0	1	33	30	1	3	34	3	99		1	1	4	0	0	0	0	1	0	0	1	0					0	0	1	0	0	0	0	0	1	0	0	0	0	0	0	0	0	1
815	3	0		30	0	0	3	33	31	1	3	37	1	99		1	1	4	0	0	0	0	1	0	0	1	0					1	0	1	0	0	0	0	0	1	0	1	0	1	1	1	0	1	1
816	3	0		26	0	0	2	33	17	3	1	21	3	1	0	1	1	4	0	0	0	0	0	0	0	1	0					1	0	1	0	0	0	0	0	1	0	1	0	0	0	1	0	1	0
817	3	0		41	0	0	3	33	17	3	2	18	2	0		1	1	2	1	0	0	0	0	0	0	1	0					1	0	1	0	0	0	0	0	1	0	1	1	1	0	0	0	1	0
818	3	0		29	0	0	3	33	22	1	3	29	3	0		1	1	1	1	0	0	0	1	0	0	1	0					1	0	1	0	0	0	0	0	1	0	1	0	1	1	1	0	1	0
819	3	0		34	0	0	3	33	26	1	2	31	3	1	0	1	1	2	0	0	1	0	1	0	1	0	0					1	0	1	0	0	0	0	0	1	0	1	0	1	0	1	0	1	0
820	3	0		20	0	0	1	33	23	1	3	30	3	0		1	1	4	0	0	0	0	0	0	0	1	1	0	0	0	1	1	0	1	0	0	0	0	0	1	0	1	0	0	1	0	0	1	0
821	3	0		16	0	0	1	33	31	1	1	36	1	99		1	1	4	0	0	0	0	1	0	0	0	0					1	0	1	0	0	0	0	0	1	0	1	0	1	1	1	0	1	0
822	3	0		18	0	0	1	33	20	1	2	34	3	1	0	1	1	4	0	0	1	0	1	0	0	0	0					1	0	1	0	0	0	0	0	1	0	1	0	1	1	1	0	0	1
823	3	0		29	0	0	3	33	45	1	1	55		1	0	1	1	3	0	0	0	0	1	0	0	1	0					1	0	1	0	0	0	0	0	1	0	1	0	1	0	1	0	1	1
824	3	0		27	0	0	2	33	22	1	2	26	2	1	0	1	1	4	0	0	0	0	1	0	0	0	0					1	0	1	0	0	0	0	0	1	0	0	1	0	0	0	0	1	1
825	3	0		24	0	0	2	33	28	1	3	32	3	0		1	1	4	0	0	0	0	0	1	0	0	0					1	0	1	1	0	0	0	1	1	0	1	0	1	1	1	0	1	0
826	3	0		36	0	0	3	33	29	1	3	28	3	1	0	1	1	4	0	0	0	0	1	0	0	1	0					1	0	1	0	0	0	0	0	1	0	1	0	1	0	1	0	1	1
827	3	0		38	0	0	3	33	39	5	3	39	3	0		1	1	2	0	0	0	0	1	0	0	1	0					1	0	1	0	0	0	0	0	1	0	1	0	1	0	1	0	1	0
828	3	0		37	0	0	3	33	34	1	2	41	1	0		1	2	4	0	0	0	0	0	1	0	0	0					1	0	1	0	0	0	0	0	1	0	1	0	1	0	1	0	1	1
829	3							33	22	3	2	23	1	99		1	1	4	0	0	0	0	0	0	0	1	0					1	1
830	3	0		24	0	0	2	33	26	3	3	29	3	99		1	1	2	1	0	1	0	1	0	0	1	0					1	0	1	0	0	0	0	0	1	0	1	1	1	0	0	0	1	1
831	3	0		38	0	0	3	33	25	1	2	27	1	0		1	1	4	0	0	0	0	1	0	0	1	0					1	0	1	0	0	0	0	0	1	0	0	0	0	0	0	0	1	1
832	3	0		30	0	0	3	33	22	1	2	25	2	1	0	1	1	2	0	0	0	0	1	0	0	1	0					1	0	1	0	0	0	0	0	1	1	1	1	1	0	1	0	1	1
833	3	0		23	0	0	2	33	23	1	2	29	3	1	0	1	1	3	0	0	0	0	0	0	0	1	0					1	0	1	0	0	0	0	0	1	0	1	1	1	0	1	0	1	1
834	3	0		36	0	0	3	33	36	1	2	47	2	99		1	1	2	1	0	0	0	1	0	0	0	0					1	0	1	0	0	0	0	0	1	0	1	0	1	0	1	0	1	0
835	3	0		9	0	0	1	33	28	1	2	28	3	1	0	1	1	4	0	0	0	0	1	0	0	1	0					1	0	1	0	0	0	0	0	1	0	1	0	1	0	1	0	1	0
836	3	0		19	0	0	1	33	22	1	3	22	1	0		1	1	4	0	0	0	0	1	0	0	1	0					1	0	1	0	0	0	0	0	1	0	1	0	1	0	1	0	1	0
837	3	0		32	0	0	3	33	21	3	2			0		1	1	4	0	0	0	0	0	0	0	1	0					1	0	1	1	0	0	0	1	1	0	1	1	1	0	1	0	1	1
838	3	0		32	0	0	3	33	29	1	3	31	1	1	0	1	1	3	0	1	0	0	1	0	0	1	1	0	0	0	1	1	0	1	1	0	0	0	1	1	0	0	0	0	1	0	0	1	1
839	3	0		10	0	0	1	33	35	1	3	52	3	0		1	1	4	0	0	0	0	1	0	0	1	0					1	0	1	1	0	0	0	1	1	0	1	0	1	1	1	0	1	0
840	3	0		25	0	0	2	33	43	1	3	41	3	1	0	1	1	4	0	0	0	0	1	0	0	0	0					0	0	1	0	0	0	0	0	1	0	1	0	1	0	1	0	1	1
841	3	0		21	0	0	2	33	21	1	3	26	3	1	0	1	1	3	0	0	0	0	1	0	0	1	0					1	0	1	0	0	0	0	0	1	0	1	0	1	0	1	0	1	0
842	3	0		17	0	0	1	33	23	1	1			1	0	1	1	4	0	0	0	0	1	0	0	1	0					1	0	1	0	0	0	0	0	1	0	0	0	1	0	0	0	1	0
843	3	0		15	0	0	1	33	37	1	2	39	2	1	1	1	1	3	0	0	0	1	1	0	0	1	1	0	0	0	1	1	0	1	0	0	0	0	0	1	0	1	0	1	1	1	1	1	0
844	3	1	0	27	0	1	2	33	24	3	3	34		1	0	1	1	3	0	0	1	0	1	0	0	1	0					1	0	1	1	0	0	0	1	1	0	0	0	0	1	1	0	1	0
845	3	0		11	0	0	1	33	24	1	3	31	3	1	0	1	1	4	0	0	1	0	1	0	0	1	0					1	0	1	1	0	0	0	1	1	0	1	0	0	1	1	0	1	0
846	3	0		15	0	0	1	33	25	1	3	26	3	1	0	1	1	2	0	0	0	0	1	0	0	0	0					1	0	1	0	0	0	0	0	1	0	1	0	1	1	1	0	1	1
847	3	0		32	0	0	3	33	26	1	2		3	0		1	1	4	0	0	0	0	1	0	0	1	0					1	0	1	0	0	0	0	0	1	1	0	1	1	0	1	0	1	1
848	3	0		37	0	0	3	33	22	1	3	24	3	0		1	1	4	0	0	1	0	0	0	0	0	0					1	0	0	0	0	0	0	0	1	0	1	0	0	0	0	0	1	1
849	3	0		19	0	0	1	33	31	1	3	33	3	1	0	1	1	2	1	0	0	0	1	0	0	0	0					1	0	1	0	0	0	0	0	1	0	1	0	1	1	1	0	1	0
850	3	0		38	0	0	3	33	29	1	1	32	1	1	0	1	1	3	0	0	0	0	1	0	0	1	0					1	0	1	0	0	0	0	0	1	0	1	1	1	1	1	0	1	0
851	3	0		23	0	0	2	34	28	1	1	35	1	1	0	1	1	2	1	0	0	0	0	0	0	0	0					1	0	1	0	0	0	0	0	1	0	1	1	1	1	1	0	1	1
852	3	0		23	0	0	2	34	25	1	1		1	0		1	1	4	0	0	0	0	0	1	0	0	0					1	0	1	0	0	0	0	0	1	0	1	1	1	1	1	0	1	1
853	3	0		26	0	0	2	34	18	3	2	21	2	99		0	0	2	0	0	0	0	0	0	0	1	0					0	0	1	0	0	0	0	0	1	0	1	1	1	1	1	0	0	1
854	3	0		13	0	0	1	34	32	1	1		1	1	0	1	1	3	0	0	0	0	1	0	0	0	1	0	0	0	1	1	0	1	0	0	0	0	0	1	0	0	0	1	0	0	0	0	1
855	3							34	20	1	1	24	1	1	0	1	1	4	0	0	0	0	1	0	0	1	0					1	1	0	0	0	0	0	0	0	0	0	0	0	0	0	0	0	1
856	3	0		19	0	0	1	34	18	1	1	32	0	1	0	1	1	4	0	0	0	0	1	0	0	0	0					0	0	1	1	0	0	0	1	1	0	1	1	1	1	1	0	1	1
857	3	0		21	0	0	2	34	16	3	1		1	99		1	2	3	0	0	0	0	0	0	0	1	0					1	0	0	0	0	0	0	0	0	0	1	1	1	0	0	0	1	0
858	3	0		36	0	0	3	34	21	1	1		1	0		1	1	4	0	0	0	0	0	1	0	0	0					1	0	0	0	0	0	0	0	1	0	0	1	1	0	0	0	0	1
859	3	0		32	0	0	3	34	25	3	1	27	1	99		1	1	4	0	0	0	0	0	1	0	0	0					0	0	1	0	0	0	0	0	0	0	1	1	1	0	0	0	0	1
860	3	0		18	0	0	1	34	40	1	1	42	1	1	0	1	1	4	0	0	0	0	0	1	0	0	0					1	0	1	0	0	0	0	0	1	0	1	0	1	0	1	0	1	1
861	3	0		26	0	0	2	34	28	3	1	29	2	0		0	0	3	1	0	0	0	0	0	0	0	0					1	0	1	0	0	0	0	0	1	0	1	1	1	0	1	0	1	1
862	3	0		21	0	0	2	34	17	1	3		3	99		1	1	2	0	0	0	0	1	0	0	0	0					1	0	1	0	0	0	0	0	1	0	1	1	1	1	1	0	1	1
863	3	0		25	0	0	2	34	22	1	1		1	1	0	0	0	2	0	0	0	0	1	0	0	0	0					0	0	1	0	0	0	0	0	1	0	0	0	1	1	1	1	1	1
864	3	0		15	0	0	1	34	17	3	1	21	2	1	0	0	0	4	0	0	0	0	0	1	0	0	0					0	0	1	0	0	0	0	0	1	0	0	0	0	0	0	0	0	1
865	3	1	0	32	0	1	3	34	16	1	2		3	1	0	0	0	3	1	0	0	0	0	0	0	1	0					0	0	0	1	0	0	0	1	0	0	1	0	0	0	0	0	1	1
866	3							34	22	1	1	30	1	0		1	1	4	0	0	0	0	0	0	0	0	0					0	1
867	3	1	1	28	1	0	2	34	19	4	2	26	1	1	0	0	0	3	0	0	0	0	0	0	0	0	0					1	0
868	3	0		32	0	0	3	34	27	1	1	35	1	0		1	1	2	1	0	0	0	0	0	0	0	1	0	0	0	1	1	0	1	1	0	0	0	1	1	0	1	1	1	1	1	0	1	1
869	3	0		32	0	0	3	34	14	3	2			99		0	0	4	0	0	0	0	0	1	0	0	0					1	0	0	0	0	0	0	0	1	0	1	1	1	1	1	0	1	1
870	3	0		28	0	0	2	34	36	1	1	41	1	1	0	1	1	4	1	0	0	0	0	0	0	0	1	0	0	0	1	0	0	1	0	0	0	0	0	1	0	0	1	1	1	1	0	1	1
871	3	0		12	0	0	1	34	22	1	3	23	2	0		1	1	4	0	0	0	0	0	0	0	0	0					0	0	1	0	0	0	0	0	1	0	1	0	1	1	1	0	1	0
872	3	0		36	0	0	3	34	37	1	1		1	0		1	1	3	0	0	0	0	0	1	0	0	1	0	0	0	1	0	0	1	0	0	0	0	0	1	0	1	0	1	1	1	0	1	1
873	3	0		28	0	0	2	34	24	1	1	28	1	0		1	1	4	1	0	0	0	0	0	0	0	0					0	0	1	0	0	0	0	0	1	0	1	1	1	1	1	0	1	1
874	3	0		32	0	0	3	34	24	1	1	28	1	0		1	1	4	0	0	0	0	1	0	0	0	0					1	0	1	0	0	0	0	0	1	0	1	0	0	0	1	0	1	1
875	3	0		28	0	0	2	34	26	3	1	34	1	1	0	1	1	3	0	0	0	0	0	1	0	0	0					0	0	1	0	0	0	0	0	1	0	0	1	1	1	1	1	1	1
876	3	0		36	0	0	3	34	27	1	1	29	1	0		1	1	4	0	0	0	0	0	1	0	0	0					1	0	1	0	0	0	0	0	1	0	0	0	0	0	0	0	0	1
877	3							34	36	1	2		2	1	0	1	1	4	0	0	0	0	0	1	0	0	0					0	1
878	3	0		30	0	0	3	34	24	1	1	25	0	0		1	1	4	0	0	0	0	0	1	0	0	1	0	0	0	1	1	0	1	0	0	0	0	0	1	0	0	0	0	0	0	0	0	1
879	3	0		12	0	0	1	34	18	1	3	25	2	1	0	1	1	4	0	0	0	0	1	0	0	0	0					1	0	1	1	0	0	1	1	1	0	0	0	0	1	1	0	1	1
880	3	0		26	0	0	2	34	21	1	1	26	0	0		1	1	4	0	0	0	0	0	1	0	0	0					0	0	1	0	0	0	0	0	1	0	0	0	0	1	1	0	1	1
881	3	0		37	0	0	3	34	17	1	2	27	2	1	0	1	1	3	0	0	0	0	0	1	0	0	0					1	0	1	0	0	0	0	0	1	0	1	1	1	1	1	0	1	1
882	3	0		19	0	0	1	34	25	1	1	29	0	1	0	1	1	4	0	0	0	0	0	1	0	0	0					1	0	1	0	0	0	0	0	1	0	1	1	1	1	1	1	1	1
883	3	0		32	0	0	3	34	33	1	2	35	1	1	0	1	1	4	0	0	0	0	0	1	0	0	0					0	0	1	0	0	0	0	0	1	0	0	1	0	1	1	0	1	1
884	3	0		17	0	0	1	34	29	1	3	30	2	1	0	1	1	4	0	0	0	0	0	1	0	0	0					1	0	1	1	0	0	0	1	1	0	0	0	1	1	1	0	1	1
885	3	1	0	28	0	1	2	34	18	1	1		1	0		1	1	4	0	0	0	0	0	0	0	0	0					0	0	0	0	0	0	0	0	1	0	0	0	0	0	0	0	1	1
886	3							35	27	1	3	30	2	1	0	1	1	3	1	0	0	0	0	0	0	0	0					1	1	1	0	0	0	0	0	0	0	1	0	0	0	0	0	1	0
887	3							35	22	3	2	29	2	99		1	1	3	1	0	0	0	1	0	0	0	1	0	0	0	1	1	1	0	0	0	0	0	0	1	0	0	0	0	0	0	0	1	0
888	3							35	18	3	2	23	3	1	0	0	0	3	0	1	1	0	1	0	0	1	0					1	1
889	3							35	41	1	1	45	1	1	0	1	1	3	0	0	1	0	1	0	0	0	0					1	1	0	0	0	0	0	0	1	0	0	0	0	0	0	0	1	0
890	3	0		35	0	0	3	35	21	1	2	27	2	0		1	1	3	1	0	0	0	0	0	0	1	0					1	0	0	0	0	0	0	0	1	0	0	1	0	0	0	0	1	0
891	3							35	21	1	2	24	1	1	0	1	1	3	0	0	0	0	0	0	0	1	0					0	1	0	0	0	0	0	0	1	0	0	0	1	0	0	0	1	0
892	3							35	20	1	1	24	1	1	0	1	1	2	1	0	0	0	0	0	0	1	0					1	1	0	0	0	0	0	0	0	0	1	0	0	0	0	0	0	0
893	3							35	19	1	2	19	1	0		1	1	3	0	0	0	0	1	0	0	0	1	0	0	0	1	0	1
894	3							35	18	1	1	25	3	1	0	1	1	2	0	0	0	0	0	0	0	1	1	0	0	0	1	1	1	0	1	0	0	0	1	1	0	0	0	0	0	0	0	0	0
895	3	0		27	0	0	2	35	19	1	2	22	1	1	0	1	1	4	0	0	0	0	1	0	0	1	0					1	0	0	0	0	0	0	0	1	0	1	0	0	0	0	0	1	0
896	3							35	20	3	3	21	3	99		0	0	4	0	0	0	0	1	0	0	1	0					1	1
897	3							35	22	3	3	25	3	1	0	0	0	2	1	0	0	0	1	0	0	0	0					1	1	0	0	0	0	0	0	0	0	1	1	1	0	0	0	1	0
898	3	0		24	0	0	2	35	24	3	1	26	1	99		0	0	3	0	0	0	0	1	0	0	0	0					1	0	0	0	0	0	0	0	1	0	0	1	1	0	0	0	0	0
899	3							35	18	1	2	21	2	0		1	1	3	0	0	0	0	1	0	0	0	0					1	1	0	0	0	0	0	0	1	0	0	0	0	0	0	0	0	0
900	3							35	30	1	3	34	2	1	0	1	1	3	0	0	0	0	1	0	0	0	0					1	1	0	0	0	0	0	0	1	0	0	0	0	0	0	0	0	0
901	3	0		31	0	0	3	35	23	3	3	25	3	1	0	0	0	2	1	0	0	0	0	0	0	0	0					1	0	0	0	0	0	0	0	1	0	1	0	1	0	0	0	0	0
902	3							35	17	1	1	25	1	0		1	1	4	0	0	0	0	1	0	0	0	0					1	1
903	3	0		33	0	0	3	35	19	1	2	22	1	0		0	0	4	0	0	0	0	0	0	0	1	1	0	0	0	0	1	0	0	0	0	0	0	0	1	0	0	0	0	0	0	0	1	0
904	3							35	24	1	2	24	1	1	0	1	1	3	1	0	0	0	0	0	0	1	0					1	1	0	0	0	0	0	0	1	0	0	0	0	0	0	0	1	0
905	3	0		36	0	0	3	35	21	1	2	25	2	0		0	0	4	0	0	0	0	0	0	0	1	0					1	0	0	0	0	0	0	0	1	0	0	0	1	0	1	0	1	0
906	3	0		38	0	0	3	35	20	3	1		2	99		1	1	3	0	0	0	0	0	1	0	0	0					1	0	1	0	0	0	0	0	1	0	0	0	0	0	0	0	0	1
907	3							35	17	1	2	22	2	0		1	1	3	0	0	1	0	1	0	0	0	1	0	0	0	1	0	1
908	3	0		36	0	0	3	35	34	1	1	37	1	1	0	1	1	3	0	0	0	0	1	0	0	1	0					1	0	1	0	0	0	0	0	1	0	1	0	1	0	0	0	1	0
909	3							35	28	1	2	37	1	0		0	0	2	1	0	0	0	1	0	0	0	0					1	1	0	0	0	0	0	0	1	0	0	0	1	0	0	0	0	0
910	3	0		24	0	0	2	35	18	1	1	20	1	99		1	1	3	0	0	0	0	0	0	0	1	0					1	0	0	0	0	0	0	0	1	0	0	0	0	0	0	0	1	0
911	3							35	16	3	2	20	1	99		0	0	3	0	0	0	0	1	0	0	0	0					1	1	0	0	0	0	0	0	1	0	1	0	1	0	1	0	0	0
912	3	0		28	0	0	2	35	15	3	2	17	1	99		0	0	2	1	0	0	0	0	0	0	0	0					1	0	0	0	0	0	0	0	1	0	1	1	1	0	0	0	0	0
913	3							35	16	3	1	16	1	0		0	0	3	0	0	0	0	1	0	0	0	0					1	1
914	3							35	21	3	3	23	3	1		1	1	2	1	0	0	0	0	0	0	1	0					1	1
915	3							35	17	1	2	21	1	1		1	1	3	0	0	0	0	0	1	0	0	0					1	1
916	3							35	17	1	2	21	1	0		1	1	3	0	0	0	0	0	0	0	1	0					1	1
917	3							36	17	1	1	19	1	99		1	1	3	0	0	0	0	1	0	0	1	0					1	1	0	0	0	0	0	0	0	0	0	0	0	0	0	0	0	1
918	3	1	0	23	0	1	2	36	17	1	2	28	2	0		1	1	4	0	1	1	0	1	0	0	1	0					1	0	1	0	0	0	0	0	1	0	1	0	1	1	1	0	1	0
919	3	0		31	0	0	3	36	25	1	2	32	3	99		1	1	4	0	1	1	0	1	0	0	1	0					1	0	1	0	0	0	0	0	1	0	1	0	1	1	1	0	1	0
920	3	0		28	0	0	2	36	19	3	2	20	1	1	0	1	1	4	0	0	0	0	0	0	1	1	0					1	0	1	0	0	0	0	0	1	1	0	0	0	1	1	0	1	1
921	3	0		29	0	0	3	36	21	1	3	30	2	1	0	1	1	4	0	1	0	0	1	0	0	0	1	0	0	0	1	1	0	1	1	0	0	0	1	1	0	1	0	1	1	1	0	1	0
922	3	0		32	0	0	3	36	19	1	2	24	1	99		1	1	4	0	0	0	0	1	0	0	1	0					1	0	1	0	0	0	0	0	1	0	0	0	0	0	1	0	1	1
923	3	0		36	0	0	3	36	21	1	2	25	2	0		1	1	3	0	0	1	0	1	0	0	0	0					1	0	1	1	0	0	0	1	1	0	1	0	1	1	1	0	1	1
924	3	0		19	0	0	1	36	28	1	3	31	2	1	0	1	1	3	0	1	1	0	1	0	0	1	0					1	0	1	1	0	0	0	1	1	0	1	1	1	1	1	0	1	0
925	3							36	23	3	1	30	2	0		1	1	4	0	0	0	0	0	1	0	0	0					1	1
926	3	0		36	0	0	3	36	20	3	1	27	1	1	0	1	1	3	1	1	0	0	1	0	0	1	0					1	0	1	0	0	0	0	0	0	1	0	1	0	0	1	0	0	0
927	3							36	21	1	2	24	1	0		0	0	3	0	0	0	0	1	0	0	0	0					1	1
928	3	0		34	0	0	3	36	22	3	2	25		0		0	0	2	1	0	1	0	0	0	0	0	0					1	0	1	1	0	0	0	1	1	0	1	1	1	1	1	0	1	0
929	3	1	0	32	1	0	3	36	23	3	2	23		0		0	0	4	0	0	0	0	0	1	0	0	0					1	0
930	3	0		28	0	0	2	36	19	1	2	21	1	0		0	0	3	0	0	0	0	0	1	0	0	0					1	0	1	1	0	0	0	1	1	1	1	1	0	1	1	0	1	1
931	3	0		34	0	0	3	36	22	1	1	28	1	0		1	1	3	0	0	0	0	1	0	0	0	0					0	0	1	1	0	0	0	1	1	1	1	1	1	1	1	0	1	0
932	3	0		36	0	0	3	36	18	1	2	28	1	0		1	1	4	0	0	0	0	0	1	0	0	0					0	0	1	0	0	0	0	0	1	0	1	0	1	1	1	0	1	0
933	3	0		38	0	0	3	36	18	1	1	21	1	0		0	0	4	0	0	0	0	0	1	0	0	0					1	0	1	1	0	0	0	1	1	0	1	0	0	1	1	0	1	0
934	3	0		36	0	0	3	36	23	1	1	30	1	0		1	2	4	1	0	0	0	0	0	0	1	1	1	0	0	1	0	0	1	1	0	0	0	1	1	1	1	1	1	1	1	1	1	0
935	3	1	0	36	0	1	3	36	20	1	2	23	3	1	0	1	1	2	1	0	0	0	0	0	0	0	0					1	0	1	0	0	0	0	0	1	1	0	1	0	1	1	0	1	0
936	3	0		28	0	0	2	36	20	3	3		2	99		0	0	3	0	0	0	0	0	1	0	0	0					1	0	1	1	0	0	0	1	1	0	1	0	1	0	1	0	1	0
937	3	0		24	0	0	2	36	28	3	3	28	3	1	0	1	1	2	1	1	1	0	1	0	0	0	1	0	0	0	1	1	0	1	1	0	0	0	1	1	0	1	0	1	1	1	0	1	0
938	3	0		26	0	0	2	36	37	1	2	57	2	1	0	1	1	3	0	0	0	0	0	1	0	0	0					1	0	1	1	0	0	0	1	1	0	1	0	1	1	1	0	1	0
939	3	0		34	0	0	3	36	17	3	2	20	3	0		1	2	3	1	0	0	0	0	0	0	0	0					1	0	1	1	0	0	0	1	1	0	1	0	1	1	1	0	1	1
940	3	1	0	32	0	1	3	36	21	3	3	21	3	1	0	0	0	2	1	0	0	0	1	0	0	1	0					1	0	1	1	0	0	0	1	1	0	1	0	0	1	1	0	1	1
941	3	0		36	0	0	3	36	26	3	3	37	3	1	0	1	1	2	1	0	0	0	0	0	0	0	0					1	0	1	0	0	0	0	0	1	0	1	0	1	1	1	0	1	0
942	3	0		16	0	0	1	36	34	1	2	45	2	1	0	1	1	3	0	0	0	0	1	0	0	1	0					1	0	1	0	0	0	0	0	1	0	1	0	1	1	1	0	1	0
943	3	0		28	0	0	2	36	17	3	1	18	1	1	0	0	0	3	1	0	0	0	0	0	0	0	0					0	0	1	0	0	0	0	0	1	0	1	0	1	1	1	0	1	0
[truncated: 6 more columns]

## Sheet: variable labels
Variable Name	Variable description	Value labels
newid	Anonymous ID
district	District/Region	distlab
hivsc	Indicator of HIV seroconversion	hivsclab
scperiod	Period of HIV seroconversion	scplab
gestage	Estimated gestational age at first ANC visit
predelivsc	Indicator of predelivery HIV infection	ynlab
postdelivsc	Indicator of postpartum HIV infection	ynlab
siteid	Health Facility ID
age	Age at enrolment
marital	Baseline Marital Status	maritlab
education	Education	edulab
partnerage	Partner's age
partnereducn	Partner's Education	edulab
partnerhivtest	Partner tested for HIV	ynlab
partnerhivstatus	Partner HIV status	hivlab
sexactive	Sexually active in past 3 months	ynlab
sexpartners	Number of sexual partners last 3 months
condomuse	Condom use with main partner	condomlab
protect1	Protective action: Consistent condom use	ynlab
protect2	Protective action: Ask partner's HIV status	ynlab
protect3	Protective action: Encourage partner to get tested	ynlab
protect4	Protective action: Encourage partner to take ARVs	ynlab
protect5	Protective action: Have one partner	ynlab
protect6	Protective action: None	ynlab
protect7	Protective action: Abstain from sex	ynlab
protect8	Protective action: Avoid sharp objects	ynlab
hxgi	History of genital infection	ynlab
syphilis	History of syphilis	ynlab
hsv	History of HSV	ynlab
gu	History of genital ulcer	ynlab
discharge	History of abnormal discharge	ynlab
hivcounseling	Counseled about HIV prevention	ynlab
nofollowup	Indicator of no follow-up visits	fuplab
fpsexactive	Sexually active during follow-up	ynlab
fpginf	Genital infection during follow-up	ynlab
fpsyphilis	Syphilis during follow-up	ynlab
fphsv	HSV during follow-up	ynlab
fpgulcer	Genital ulcer during follow-up	ynlab
fpdischarge	Abnormal discharge during follow-up	ynlab
fpmultipartner	Multiple partners during follow-up	ynlab
fpcondommain	Used condoms with main partner during follow-up	ynlab
fpcondomother	Used condoms with other partners during follow-up	ynlab
fpprotect1	Protective action during follow-up: Consistent condom use	ynlab
fpprotect2	Protective action during follow-up: Ask partner's HIV status	ynlab
fpprotect3	Protective action during follow-up: Encourage partner to get tested	ynlab
fpprotect4	Protective action during follow-up: Encourage partner to take ARVs	ynlab
fpprotect5	Protective action during follow-up: Have one partner	ynlab
fpprotect6	Protective action during follow-up: None	ynlab
fpprotect7	Protective action during follow-up: Abstain from sex	ynlab
fpprotect8	Protective action during follow-up: Avoid sharp objects	ynlab
pep	Received ARVs for protection during follow-up	ynlab
predelivfupyrs	Time from enrolment to delivery or infection
tfupyrs	Time from enrolment to last visit or infection
postdelivfupyrs	Time from delivery to last visit or infection

## Sheet: Value labels
Label name	Code	Label
ynlab:
	1	Yes
	0	No
	99	DK
maritlab:
	1	Married
	2	Living with partner
	3	Never married
	4	Divorced
	5	Widowed
edulab:
	0	No school
	1	Primary
	2	Secondary
	3	Post secondary
hivlab:
	0	Negative
	1	Positive
condomlab:
	1	Always
	2	Most times
	3	Rarely
	4	Never
scplab:
	0	Post Delivery
	1	Pre Delivery
distlab:
	1	Thaba_Tseka
	2	Butha-Buthe
	3	Mohale's Hoek
hivsclab:
	1	Seroconvertor/newly infected
	0	HIV negative
fuplab:
	1	No follow-up
	0	Has follow-up
